# Supplementary material for: Computational study of the relative stability of some glass-ionomer cement-forming molecules
Source: PubMed Central journal article supplement (PMC9519700; doi:10.1007/s00894-022-05211-x), 2022-09-28
Supplement: 894_2022_5211_MOESM1_ESM.pdf [file 894_2022_5211_MOESM1_ESM.pdf]

Journal of Molecular Modeling

*Supplementary Information*

**Computational study of the relative stability of some glass-ionomer  
cement-forming molecules.**

Jair Gaviria<sup>1\*</sup>, Silvia Quijano<sup>2</sup>, Jairo Quijano<sup>1</sup>, Pablo Ruiz<sup>1,3</sup>

<sup>1</sup> Laboratorio de Físicoquímica Orgánica, Facultad de Ciencias, Universidad Nacional de Colombia, Medellín, Colombia, 050034

<sup>2</sup> Programa de Microbiología, Facultad de Ciencias Básicas, Universidad Santiago de Cali, Cali, Colombia

<sup>3</sup> Facultad de Ciencias Exactas y Aplicadas, Instituto Tecnológico Metropolitano, Medellín, Colombia

\*jgarango@unal.edu.co

<https://orcid.org/0000-0003-0293-7078>

**Table S1.** Electronic Energies (Eel), zero-point vibrational energies (ZPE), thermal correction to enthalpies (TCH), enthalpies (H) and Gibbs energies (G) in Hartrees; entropies (S) in cal·mol<sup>-1</sup>·K<sup>-1</sup>, for all the molecules as products of the addition reaction of glycidyl methacrylate (GM) to the polyacids studied. Calculated at M06-2X/6-311G(d,p) at 313.15 K.

| Molecule      | GM<br>Position | Eel                                                 | ZPE      | TCH      | S       | H        | G          |
|---------------|----------------|-----------------------------------------------------|----------|----------|---------|----------|------------|
| <b>AACA-1</b> | 1              | -1896.34044                                         | 0.650811 | 0.694893 | 244.981 | -1895.65 | -1895.7678 |
|               | 2              | -1896.368707                                        | 0.650118 | 0.694441 | 242.862 | -1895.67 | -1895.7955 |
|               | 3              | -1896.376103                                        | 0.649998 | 0.694478 | 243.529 | -1895.68 | -1895.8032 |
|               | 4              | -1896.339988                                        | 0.650404 | 0.695238 | 249.44  | -1895.64 | -1895.7692 |
| <b>AH-2</b>   | 1              | -2003.438934                                        | 0.614876 | 0.660193 | 253.969 | -2002.78 | -2002.9055 |
|               | 2              | -2003.44223                                         | 0.615273 | 0.660341 | 251.216 | -2002.78 | -2002.9073 |
|               | 3              | -2003.444175                                        | 0.615524 | 0.659873 | 242.207 | -2002.78 | -2002.9052 |
|               | 4              | -2003.387192                                        | 0.614124 | 0.659035 | 249.931 | -2002.73 | -2002.8529 |
| <b>AADH-1</b> | 1              | -2048.739667                                        | 0.673556 | 0.720579 | 254.529 | -2048.02 | -2048.1461 |
|               | 2              | -2048.716184                                        | 0.672517 | 0.71975  | 266.541 | -2048    | -2048.1294 |
|               | 3              | -2048.744561                                        | 0.67241  | 0.720096 | 272.418 | -2048.02 | -2048.1604 |
|               | 4              | -2048.746397                                        | 0.672633 | 0.719175 | 256.74  | -2048.03 | -2048.1553 |
| <b>MH-1</b>   | 1              | -2042.7399                                          | 0.643247 | 0.689691 | 258.109 | -2042.05 | -2042.179  |
|               | 2              | -2042.749009                                        | 0.643463 | 0.689015 | 244.839 | -2042.06 | -2042.1822 |
|               | 3              | -2042.749674                                        | 0.644272 | 0.690349 | 254.866 | -2042.06 | -2042.1865 |
|               | 4              | -2042.713358                                        | 0.643413 | 0.689758 | 258.796 | -2042.02 | -2042.1527 |
| <b>NVP-1</b>  | 1              | -1627.955671                                        | 0.554806 | 0.592718 | 216.874 | -1627.36 | -1627.4712 |
|               | 2              | -1627.958087                                        | 0.554438 | 0.592705 | 216.701 | -1627.37 | -1627.4735 |
|               | 3              | -1627.951336                                        | 0.554311 | 0.592665 | 220.313 | -1627.36 | -1627.4686 |
|               |                | There are no COOH groups at the amino acid position |          |          |         |          |            |
| <b>NMP-1</b>  | 1              | -1895.124967                                        | 0.627608 | 0.670979 | 241.863 | -1894.45 | -1894.5747 |
|               | 2              | -1895.145252                                        | 0.627241 | 0.670713 | 243.486 | -1894.47 | -1894.596  |
|               | 3              | -1895.141165                                        | 0.627642 | 0.670875 | 242.423 | -1894.47 | -1894.5913 |
|               | 4              | -1895.117622                                        | 0.628543 | 0.671691 | 237.853 | -1894.45 | -1894.5646 |
| <b>NVC-1</b>  | 1              | -1706.534095                                        | 0.612147 | 0.652587 | 228.443 | -1705.88 | -1705.9955 |
|               | 2              | -1706.574889                                        | 0.612946 | 0.653339 | 230.147 | -1705.92 | -1706.0364 |
|               | 3              | -1706.545445                                        | 0.614081 | 0.654632 | 234.036 | -1705.89 | -1706.0076 |
|               |                | There are no COOH groups at the amino acid position |          |          |         |          |            |
| <b>EU-2</b>   | 1              | -1802.58143                                         | 0.609124 | 0.652276 | 248.555 | -1801.93 | -1802.0532 |
|               | 2              | -1802.589327                                        | 0.610579 | 0.652703 | 231.866 | -1801.94 | -1802.0523 |
|               | 3              | -1802.596847                                        | 0.608914 | 0.651743 | 236.29  | -1801.95 | -1802.063  |
|               |                | There are no COOH groups at the amino acid position |          |          |         |          |            |
| <b>ABA-1</b>  | 1              | -1778.422643                                        | 0.562605 | 0.604247 | 237.814 | -1777.82 | -1777.9371 |
|               | 2              | -1778.441805                                        | 0.563353 | 0.604274 | 229.37  | -1777.84 | -1777.952  |
|               | 3              | -1778.436145                                        | 0.563322 | 0.604518 | 234.772 | -1777.83 | -1777.9488 |
|               | 4              | -1778.423053                                        | 0.563731 | 0.604289 | 230.731 | -1777.82 | -1777.9339 |
| <b>MBA-1</b>  | 1              | -1817.719451                                        | 0.591469 | 0.634093 | 239.29  | -1817.09 | -1817.2048 |

|                |        |              |          |          |         |          |            |
|----------------|--------|--------------|----------|----------|---------|----------|------------|
|                | 2      | -1817.75288  | 0.592265 | 0.634228 | 237.489 | -1817.12 | -1817.2372 |
|                | 3      | -1817.743332 | 0.591071 | 0.632494 | 236.262 | -1817.11 | -1817.2287 |
|                | 4      | -1817.730334 | 0.59158  | 0.633639 | 234.158 | -1817.1  | -1817.2135 |
| <b>AADOH-3</b> | 1      | -2123.952656 | 0.677866 | 0.725783 | 254.479 | -2123.23 | -2123.3539 |
|                | 2      | -2123.97071  | 0.677982 | 0.725802 | 258.29  | -2123.24 | -2123.3738 |
|                | 3      | -2123.969976 | 0.677108 | 0.725805 | 265.347 | -2123.24 | -2123.3766 |
|                | 4      | -2123.913945 | 0.677835 | 0.726375 | 263.947 | -2123.19 | -2123.3193 |
| <b>AG-1</b>    | 1      | -1739.118093 | 0.53415  | 0.574118 | 229.631 | -1738.54 | -1738.6586 |
|                | 2      | -1739.119103 | 0.533761 | 0.573435 | 225.036 | -1738.55 | -1738.658  |
|                | 3      | -1739.118017 | 0.53383  | 0.57335  | 223.796 | -1738.54 | -1738.6563 |
|                | 4      | -1739.109131 | 0.53373  | 0.573485 | 229.747 | -1738.54 | -1738.6503 |
| <b>AGA-2</b>   | 1      | -2006.311762 | 0.609282 | 0.653701 | 244.276 | -2005.66 | -2005.78   |
|                | 2      | -2006.327976 | 0.607101 | 0.652571 | 255.488 | -2005.68 | -2005.8029 |
|                | 3      | -2006.331025 | 0.607935 | 0.652377 | 244.122 | -2005.68 | -2005.8005 |
|                | 4 (CH) | -2006.299016 | 0.606954 | 0.652452 | 255.388 | -2005.65 | -2005.774  |
|                | 4(CH2) | -2006.308899 | 0.608522 | 0.65307  | 246.263 | -2005.66 | -2005.7787 |
| <b>MGA-1</b>   | 1      | -2045.605403 | 0.635343 | 0.681602 | 258.832 | -2044.92 | -2045.053  |
|                | 2      | -2045.616947 | 0.636361 | 0.68269  | 250.524 | -2044.93 | -2045.0593 |
|                | 3      | -2045.605807 | 0.635699 | 0.681514 | 247.754 | -2044.92 | -2045.0479 |
|                | 4 CH   | -2045.562104 | 0.634798 | 0.680198 | 244.572 | -2044.88 | -2045.004  |
|                | 4 CH2  | -2045.604195 | 0.636062 | 0.682095 | 250.51  | -2044.92 | -2045.0471 |
| <b>MG-1</b>    | 1      | -1778.425774 | 0.561651 | 0.603336 | 240.338 | -1777.82 | -1777.9424 |
|                | 2      | -1778.42237  | 0.563111 | 0.603922 | 226.98  | -1777.82 | -1777.9317 |
|                | 3      | -1778.410302 | 0.561952 | 0.602779 | 227.356 | -1777.81 | -1777.921  |
|                | 4      | -1778.412814 | 0.562927 | 0.603219 | 221.892 | -1777.81 | -1777.9203 |

---

**Table S2.** Hirshfeld atomic charges, cation (qN-1), neutral (qN) and condensed Fukui indices ( $f^-$ ). See figures S1 for numbering.

| AACA-1-GM3 |      |           |           |           | AADH-1-GM3 |      |           |           |           |
|------------|------|-----------|-----------|-----------|------------|------|-----------|-----------|-----------|
| #          | atom | qN-1      | qN        | ( $f^-$ ) | #          | atom | qN-1      | qN        | ( $f^-$ ) |
| 1          | C    | 0,012954  | 0,012616  | -0,000338 | 1          | C    | -0.015356 | -0.017181 | -0.001825 |
| 2          | C    | -0,046663 | -0,048989 | -0,002326 | 2          | C    | -0.008526 | -0.009056 | -0.00053  |
| 3          | H    | 0,030253  | 0,028338  | -0,001915 | 3          | H    | 0.023513  | 0.024129  | 0.000616  |
| 4          | H    | 0,043386  | 0,032891  | -0,010495 | 4          | C    | -0.077643 | -0.08249  | -0.004847 |
| 5          | C    | -0,034618 | -0,033775 | 0,000843  | 5          | H    | 0.041576  | 0.034792  | -0.006784 |
| 6          | H    | 0,00706   | 0,018773  | 0,011713  | 6          | H    | 0.040634  | 0.035021  | -0.005613 |
| 7          | C    | 0,208372  | 0,205249  | -0,003123 | 7          | H    | 0.037412  | 0.031748  | -0.005664 |
| 8          | O    | -0,253317 | -0,280517 | -0,0272   | 8          | C    | 0.197982  | 0.189744  | -0.008238 |
| 9          | O    | -0,171684 | -0,183931 | -0,012247 | 9          | O    | -0.214154 | -0.211343 | 0.002811  |
| 10         | H    | 0,138239  | 0,140189  | 0,00195   | 10         | N    | -0.060446 | -0.067122 | -0.006676 |
| 11         | C    | -0,04153  | -0,046811 | -0,005281 | 11         | H    | 0.150264  | 0.13655   | -0.013714 |
| 12         | H    | 0,052277  | 0,033836  | -0,018441 | 12         | C    | 0.046573  | 0.03256   | -0.014013 |
| 13         | H    | 0,038364  | 0,031626  | -0,006738 | 13         | C    | -0.028765 | -0.045692 | -0.016927 |
| 14         | C    | -0,018692 | -0,022351 | -0,003659 | 14         | H    | 0.053952  | 0.031537  | -0.022415 |
| 15         | H    | 0,04092   | 0,030403  | -0,010517 | 15         | H    | 0.071926  | 0.043217  | -0.028709 |
| 16         | C    | 0,215308  | 0,174241  | -0,041067 | 16         | C    | 0.114156  | -0.015355 | -0.129511 |
| 17         | O    | -0,123327 | -0,287524 | -0,164197 | 17         | C    | 0.115027  | -0.038942 | -0.153969 |
| 18         | N    | 0,114825  | -0,073842 | -0,188667 | 18         | C    | 0.015659  | -0.047961 | -0.06362  |
| 19         | H    | 0,176532  | 0,121756  | -0,054776 | 19         | C    | 0.021546  | -0.044169 | -0.065715 |
| 20         | C    | 0,031647  | -0,001636 | -0,033283 | 20         | C    | 0.034723  | -0.030231 | -0.064954 |
| 21         | H    | 0,071741  | 0,028348  | -0,043393 | 21         | C    | 0.026952  | -0.039939 | -0.066891 |
| 22         | H    | 0,085883  | 0,033995  | -0,051888 | 22         | H    | 0.075923  | 0.038751  | -0.037172 |
| 23         | C    | -0,045192 | -0,051098 | -0,005906 | 23         | H    | 0.053869  | 0.021833  | -0.032036 |
| 24         | H    | 0,034273  | 0,023815  | -0,010458 | 24         | H    | 0.089971  | 0.05088   | -0.039091 |
| 25         | H    | 0,044474  | 0,030896  | -0,013578 | 25         | H    | 0.085906  | 0.044323  | -0.041583 |
| 26         | C    | -0,038035 | -0,045168 | -0,007133 | 26         | H    | 0.099421  | 0.044681  | -0.05474  |
| 27         | H    | 0,040588  | 0,031737  | -0,008851 | 27         | C    | -0.045084 | -0.046223 | -0.001139 |
| 28         | H    | 0,047815  | 0,030279  | -0,017536 | 28         | H    | 0.042203  | 0.034107  | -0.008096 |
| 29         | C    | -0,041234 | -0,044517 | -0,003283 | 29         | H    | 0.03295   | 0.032074  | -0.000876 |
| 30         | H    | 0,050626  | 0,035693  | -0,014933 | 30         | C    | -0.028977 | -0.027291 | 0.001686  |
| 31         | H    | 0,031661  | 0,033162  | 0,001501  | 31         | H    | 0.013964  | 0.023624  | 0.00966   |
| 32         | C    | -0,04608  | -0,049445 | -0,003365 | 32         | C    | -0.050435 | -0.052336 | -0.001901 |
| 33         | H    | 0,061483  | 0,05154   | -0,009943 | 33         | H    | 0.032994  | 0.02711   | -0.005884 |
| 34         | H    | 0,05011   | 0,04208   | -0,00803  | 34         | H    | 0.031882  | 0.026671  | -0.005211 |
| 35         | C    | 0,2289    | 0,231012  | 0,002112  | 35         | C    | 0.202794  | 0.204837  | 0.002043  |
| 36         | O    | -0,222791 | -0,233223 | -0,010432 | 36         | O    | -0.254442 | -0.271135 | -0.016693 |
| 37         | O    | -0,149907 | -0,143239 | 0,006668  | 37         | O    | -0.187687 | -0.179555 | 0.008132  |
| 38         | H    | 0,133817  | 0,136815  | 0,002998  | 38         | H    | 0.120239  | 0.125882  | 0.005643  |
| 39         | C    | -0,049936 | -0,052413 | -0,002477 | 39         | C    | 0.014964  | 0.015127  | 0.000163  |
| 40         | H    | 0,053112  | 0,04628   | -0,006832 | 40         | C    | 0.212313  | 0.207364  | -0.004949 |
| 41         | H    | 0,058656  | 0,052227  | -0,006429 | 41         | O    | -0.27797  | -0.252972 | 0.024998  |
| 42         | C    | 0,235249  | 0,234938  | -0,000311 | 42         | O    | -0.171715 | -0.182036 | -0.010321 |
| 43         | O    | -0,226063 | -0,213305 | 0,012758  | 43         | H    | 0.128928  | 0.123846  | -0.005082 |
| 44         | O    | -0,086756 | -0,094037 | -0,007281 | 44         | C    | -0.048207 | -0.050905 | -0.002698 |
| 45         | C    | -0,036717 | -0,04407  | -0,007353 | 45         | H    | 0.057688  | 0.054151  | -0.003537 |
| 46         | H    | 0,052219  | 0,031177  | -0,021042 | 46         | H    | 0.048978  | 0.04472   | -0.004258 |
| 47         | H    | 0,042524  | 0,033534  | -0,00899  | 47         | C    | -0.085647 | -0.084989 | 0.000658  |
| 48         | C    | -0,082681 | -0,089008 | -0,006327 | 48         | H    | 0.042306  | 0.038594  | -0.003712 |
| 49         | H    | 0,055541  | 0,033564  | -0,021977 | 49         | H    | 0.017983  | 0.031143  | 0.01316   |
| 50         | H    | 0,022245  | 0,026498  | 0,004253  | 50         | H    | 0.032196  | 0.027315  | -0.004881 |
| 51         | H    | 0,034286  | 0,026405  | -0,007881 | 51         | C    | 0.233625  | 0.232782  | -0.000843 |
| 52         | C    | -0,073402 | -0,078922 | -0,00552  | 52         | O    | -0.210406 | -0.214009 | -0.003603 |
| 53         | H    | 0,042127  | 0,035067  | -0,00706  | 53         | O    | -0.10124  | -0.103529 | -0.002289 |
| 54         | H    | 0,046968  | 0,038064  | -0,008904 | 54         | C    | -0.074923 | -0.079298 | -0.004375 |
| 55         | H    | 0,040096  | 0,036304  | -0,003792 | 55         | H    | 0.042666  | 0.040779  | -0.001887 |
| 56         | C    | 0,218522  | 0,211093  | -0,007429 | 56         | H    | 0.041922  | 0.03932   | -0.002602 |
| 57         | O    | -0,288196 | -0,271524 | 0,016672  | 57         | H    | 0.049405  | 0.038953  | -0.010452 |
| 58         | O    | -0,166943 | -0,181308 | -0,014365 | 58         | H    | 0.037512  | 0.031505  | -0.006007 |

|    |   |           |           |           |    |   |           |           |           |
|----|---|-----------|-----------|-----------|----|---|-----------|-----------|-----------|
| 59 | H | 0,128608  | 0,125889  | -0,002719 | 59 | C | 0.199794  | 0.200001  | 0.000207  |
| 60 | C | 0,072688  | 0,073855  | 0,001167  | 60 | O | -0.249732 | -0.279146 | -0.029414 |
| 61 | C | -0,068712 | -0,083687 | -0,014975 | 61 | O | -0.177266 | -0.1871   | -0.009834 |
| 62 | H | 0,060721  | 0,052255  | -0,008466 | 62 | H | 0.120214  | 0.121284  | 0.00107   |
| 63 | H | 0,065055  | 0,058685  | -0,00637  | 63 | H | 0.069602  | 0.050894  | -0.018708 |
| 64 | C | 0,029631  | 0,02853   | -0,001101 | 64 | C | 0.068624  | 0.068608  | -1.6E-05  |
| 65 | H | 0,032936  | 0,036992  | 0,004056  | 65 | C | -0.066964 | -0.068783 | -0.001819 |
| 66 | H | 0,056497  | 0,04978   | -0,006717 | 66 | H | 0.066069  | 0.061442  | -0.004627 |
| 67 | O | -0,116264 | -0,11742  | -0,001156 | 67 | H | 0.050044  | 0.052577  | 0.002533  |
| 68 | C | 0,21178   | 0,210589  | -0,001191 | 68 | C | 0.033547  | 0.032943  | -0.000604 |
| 69 | C | 0,006085  | -0,008101 | -0,014186 | 69 | H | 0.05006   | 0.050026  | -3.4E-05  |
| 70 | C | -0,032698 | -0,056427 | -0,023729 | 70 | H | 0.055349  | 0.052154  | -0.003195 |
| 71 | H | 0,059087  | 0,048007  | -0,01108  | 71 | O | -0.124759 | -0.123815 | 0.000944  |
| 72 | H | 0,046428  | 0,040557  | -0,005871 | 72 | C | 0.208381  | 0.208502  | 0.000121  |
| 73 | C | -0,081055 | -0,086861 | -0,005806 | 73 | C | -0.011588 | -0.010086 | 0.001502  |
| 74 | H | 0,045505  | 0,03758   | -0,007925 | 74 | C | -0.049825 | -0.054895 | -0.00507  |
| 75 | H | 0,047158  | 0,037226  | -0,009932 | 75 | H | 0.05168   | 0.049476  | -0.002204 |
| 76 | H | 0,035157  | 0,032807  | -0,00235  | 76 | H | 0.05135   | 0.048283  | -0.003067 |
| 77 | O | -0,247894 | -0,254026 | -0,006132 | 77 | C | -0.08601  | -0.085811 | 0.000199  |
|    |   |           |           |           | 78 | H | 0.04119   | 0.039132  | -0.002058 |
|    |   |           |           |           | 79 | H | 0.039681  | 0.039201  | -0.00048  |
|    |   |           |           |           | 80 | H | 0.033009  | 0.036462  | 0.003453  |
|    |   |           |           |           | 81 | O | -0.265273 | -0.267192 | -0.001919 |

| AADOH-3-GM3 |      |           |           |                   | AGA-2-GM2 |      |           |           |                   |
|-------------|------|-----------|-----------|-------------------|-----------|------|-----------|-----------|-------------------|
| #           | atom | qN-1      | qN        | (f <sup>-</sup> ) | #         | atom | qN-1      | qN        | (f <sup>-</sup> ) |
| 1           | H    | 0.041313  | 0.032017  | -0.009296         | 1         | H    | 0,03404   | 0,03045   | -0,00359          |
| 2           | C    | -0.079802 | -0.084084 | -0.004282         | 2         | C    | -0,081084 | -0,086092 | -0,005008         |
| 3           | H    | 0.031883  | 0.029253  | -0.00263          | 3         | H    | 0,032288  | 0,029823  | -0,002465         |
| 4           | H    | 0.033106  | 0.030613  | -0.002493         | 4         | H    | 0,043685  | 0,032676  | -0,011009         |
| 5           | C    | -0.037319 | -0.040014 | -0.002695         | 5         | C    | -0,042337 | -0,045809 | -0,003472         |
| 6           | H    | 0.03571   | 0.031802  | -0.003908         | 6         | H    | 0,037402  | 0,030618  | -0,006784         |
| 7           | H    | 0.033574  | 0.029694  | -0.00388          | 7         | H    | 0,034753  | 0,030706  | -0,004047         |
| 8           | C    | -0.025021 | -0.023884 | 0.001137          | 8         | C    | -0,019742 | -0,021564 | -0,001822         |
| 9           | H    | 0.025828  | 0.025578  | -0.00025          | 9         | H    | 0,037229  | 0,034598  | -0,002631         |
| 10          | C    | 0.217627  | 0.219182  | 0.001555          | 10        | C    | 0,220581  | 0,220037  | -0,000544         |
| 11          | O    | -0.261833 | -0.257126 | 0.004707          | 11        | O    | -0,267979 | -0,273514 | -0,005535         |
| 12          | O    | -0.152802 | -0.155743 | -0.002941         | 12        | O    | -0,158475 | -0,160641 | -0,002166         |
| 13          | H    | 0.174953  | 0.17529   | 0.000337          | 13        | H    | 0,150147  | 0,14852   | -0,001627         |
| 14          | C    | -0.060964 | -0.061283 | -0.000319         | 14        | C    | -0,039787 | -0,042497 | -0,00271          |
| 15          | H    | 0.01633   | 0.017499  | 0.001169          | 15        | H    | 0,046919  | 0,03438   | -0,012539         |
| 16          | H    | 0.037866  | 0.030813  | -0.007053         | 16        | H    | 0,029405  | 0,027559  | -0,001846         |
| 17          | C    | 0.01713   | 0.016742  | -0.000388         | 17        | C    | -0,027127 | -0,031745 | -0,004618         |
| 18          | C    | 0.213806  | 0.214156  | 0.00035           | 18        | C    | 0,194212  | 0,166806  | -0,027406         |
| 19          | O    | -0.235378 | -0.24824  | -0.012862         | 19        | O    | -0,185611 | -0,295066 | -0,109455         |
| 20          | O    | -0.156504 | -0.157044 | -0.00054          | 20        | N    | 0,035889  | -0,092143 | -0,128032         |
| 21          | C    | -0.065168 | -0.061387 | 0.003781          | 21        | H    | 0,122754  | 0,093705  | -0,029049         |
| 22          | H    | 0.019266  | 0.02993   | 0.010664          | 22        | C    | 0,045001  | 0,029123  | -0,015878         |
| 23          | H    | 0.028334  | 0.030149  | 0.001815          | 23        | C    | -0,029405 | -0,03629  | -0,006885         |
| 24          | C    | 0.206439  | 0.213613  | 0.007174          | 24        | H    | 0,060304  | 0,042243  | -0,018061         |
| 25          | O    | -0.233696 | -0.232035 | 0.001661          | 25        | H    | 0,05479   | 0,045848  | -0,008942         |
| 26          | O    | -0.093299 | -0.09434  | -0.001041         | 26        | C    | -0,048938 | -0,054042 | -0,005104         |
| 27          | C    | -0.003945 | -0.004401 | -0.000456         | 27        | H    | 0,042314  | 0,034434  | -0,00788          |
| 28          | C    | -0.012967 | -0.013588 | -0.000621         | 28        | H    | 0,066993  | 0,050754  | -0,016239         |
| 29          | C    | 0.187843  | 0.183341  | -0.004502         | 29        | C    | 0,224216  | 0,224962  | 0,000746          |
| 30          | O    | -0.229252 | -0.246148 | -0.016896         | 30        | O    | -0,253441 | -0,260095 | -0,006654         |
| 31          | N    | -0.077993 | -0.070918 | 0.007075          | 31        | O    | -0,158044 | -0,167111 | -0,009067         |
| 32          | H    | 0.113179  | 0.115771  | 0.002592          | 32        | H    | 0,134908  | 0,132799  | -0,002109         |
| 33          | C    | 0.03274   | 0.024844  | -0.007896         | 33        | C    | -0,044795 | -0,048776 | -0,003981         |
| 34          | C    | -0.035532 | -0.049712 | -0.01418          | 34        | H    | 0,040255  | 0,032012  | -0,008243         |
| 35          | H    | 0.057033  | 0.038368  | -0.018665         | 35        | H    | 0,041286  | 0,028879  | -0,012407         |
| 36          | H    | 0.067639  | 0.045237  | -0.022402         | 36        | C    | 0,013583  | 0,014428  | 0,000845          |

|    |   |           |           |           |    |   |           |           |           |
|----|---|-----------|-----------|-----------|----|---|-----------|-----------|-----------|
| 37 | C | 0.083821  | -0.023122 | -0.106943 | 37 | C | -0,052692 | -0,054902 | -0,00221  |
| 38 | C | 0.160159  | 0.078461  | -0.081698 | 38 | H | 0,05673   | 0,045843  | -0,010887 |
| 39 | C | 0.00259   | -0.045797 | -0.048387 | 39 | H | 0,055943  | 0,04968   | -0,006263 |
| 40 | C | -0.004029 | -0.048723 | -0.044694 | 40 | C | 0,223113  | 0,222487  | -0,000626 |
| 41 | C | 0.023546  | -0.052691 | -0.076237 | 41 | O | -0,231536 | -0,234359 | -0,002823 |
| 42 | C | 0.008944  | -0.061405 | -0.070349 | 42 | O | -0,154585 | -0,172886 | -0,018301 |
| 43 | H | 0.0665    | 0.034615  | -0.031885 | 43 | H | 0,159889  | 0,154804  | -0,005085 |
| 44 | H | 0.07122   | 0.037631  | -0.033589 | 44 | H | 0,020888  | 0,016265  | -0,004623 |
| 45 | H | 0.088389  | 0.050606  | -0.037783 | 45 | C | 0,228438  | 0,220657  | -0,007781 |
| 46 | H | 0.074475  | 0.040776  | -0.033699 | 46 | O | -0,223849 | -0,246787 | -0,022938 |
| 47 | H | 0.030148  | 0.026754  | -0.003394 | 47 | O | -0,146941 | -0,167127 | -0,020186 |
| 48 | C | -0.082075 | -0.086711 | -0.004636 | 48 | H | 0,207347  | 0,19009   | -0,017257 |
| 49 | H | 0.042368  | 0.034006  | -0.008362 | 49 | H | 0,079346  | 0,041565  | -0,037781 |
| 50 | H | 0.036194  | 0.030586  | -0.005608 | 50 | C | -0,071149 | -0,078002 | -0,006853 |
| 51 | H | 0.039905  | 0.036655  | -0.00325  | 51 | H | 0,042058  | 0,034719  | -0,007339 |
| 52 | H | 0.055106  | 0.046181  | -0.008925 | 52 | H | 0,045931  | 0,037107  | -0,008824 |
| 53 | C | -0.079621 | -0.081512 | -0.001891 | 53 | H | 0,049373  | 0,0394    | -0,009973 |
| 54 | H | 0.027855  | 0.034725  | 0.00687   | 54 | C | 0,229074  | 0,224413  | -0,004661 |
| 55 | H | 0.053667  | 0.0441    | -0.009567 | 55 | O | -0,206205 | -0,230287 | -0,024082 |
| 56 | H | 0.04213   | 0.037514  | -0.004616 | 56 | O | -0,073778 | -0,103776 | -0,029998 |
| 57 | H | 0.037189  | 0.032782  | -0.004407 | 57 | C | 0,115177  | 0,070566  | -0,044611 |
| 58 | C | 0.206839  | 0.200312  | -0.006527 | 58 | C | -0,017158 | -0,108987 | -0,091829 |
| 59 | O | -0.257627 | -0.276738 | -0.019111 | 59 | H | 0,070119  | 0,040987  | -0,029132 |
| 60 | O | -0.178298 | -0.19885  | -0.020552 | 60 | H | 0,075303  | 0,04643   | -0,028873 |
| 61 | H | 0.123391  | 0.118706  | -0.004685 | 61 | C | 0,031984  | 0,025415  | -0,006569 |
| 62 | O | -0.062548 | -0.198302 | -0.135754 | 62 | H | 0,033011  | 0,028536  | -0,004475 |
| 63 | H | 0.152785  | 0.121331  | -0.031454 | 63 | H | 0,061037  | 0,047486  | -0,013551 |
| 64 | C | 0.061858  | 0.066956  | 0.005098  | 64 | O | -0,100449 | -0,105726 | -0,005277 |
| 65 | C | -0.091506 | -0.106315 | -0.014809 | 65 | C | 0,2231    | 0,221896  | -0,001204 |
| 66 | H | 0.050404  | 0.038658  | -0.011746 | 66 | O | -0,228165 | -0,224916 | 0,003249  |
| 67 | H | 0.052397  | 0.04607   | -0.006327 | 67 | C | -0,008723 | -0,007195 | 0,001528  |
| 68 | C | 0.031352  | 0.030744  | -0.000608 | 68 | C | -0,042627 | -0,058189 | -0,015562 |
| 69 | H | 0.062878  | 0.05333   | -0.009548 | 69 | H | 0,060473  | 0,048616  | -0,011857 |
| 70 | H | 0.029822  | 0.034783  | 0.004961  | 70 | H | 0,048937  | 0,046026  | -0,002911 |
| 71 | O | -0.091784 | -0.102178 | -0.010394 | 71 | C | -0,079795 | -0,082662 | -0,002867 |
| 72 | C | 0.229995  | 0.224393  | -0.005602 | 72 | H | 0,047763  | 0,039111  | -0,008652 |
| 73 | C | -0.009519 | -0.009291 | 0.000228  | 73 | H | 0,043949  | 0,04238   | -0,001569 |
| 74 | C | -0.033891 | -0.046424 | -0.012533 | 74 | H | 0,042623  | 0,041488  | -0,001135 |
| 75 | H | 0.062127  | 0.051407  | -0.01072  |    |   |           |           |           |
| 76 | H | 0.05135   | 0.052333  | 0.000983  |    |   |           |           |           |
| 77 | C | -0.080623 | -0.084138 | -0.003515 |    |   |           |           |           |
| 78 | H | 0.048996  | 0.040823  | -0.008173 |    |   |           |           |           |
| 79 | H | 0.044458  | 0.040436  | -0.004022 |    |   |           |           |           |
| 80 | H | 0.041355  | 0.039197  | -0.002158 |    |   |           |           |           |
| 81 | O | -0.251123 | -0.228084 | 0.023039  |    |   |           |           |           |
| 82 | H | 0.198126  | 0.19129   | -0.006836 |    |   |           |           |           |

| AH-2-GM2 |      |           |           |                   | EU-2 GM3 |      |           |           |                   |
|----------|------|-----------|-----------|-------------------|----------|------|-----------|-----------|-------------------|
| #        | atom | qN-1      | qN        | (f <sup>-</sup> ) | #        | atom | qN-1      | qN        | (f <sup>-</sup> ) |
| 1        | C    | 0,198874  | 0,167997  | -0,030877         | 1        | H    | 0.033429  | 0.031896  | -0.001533         |
| 2        | O    | -0,143918 | -0,280832 | -0,136914         | 2        | C    | -0.079344 | -0.084587 | -0.005243         |
| 3        | N    | 0,037025  | -0,093799 | -0,130824         | 3        | H    | 0.04647   | 0.034692  | -0.011778         |
| 4        | H    | 0,117478  | 0,09082   | -0,026658         | 4        | H    | 0.031181  | 0.025682  | -0.005499         |
| 5        | C    | 0,0501    | 0,028565  | -0,021535         | 5        | C    | -0.039455 | -0.044293 | -0.004838         |
| 6        | H    | 0,061178  | 0,044042  | -0,017136         | 6        | H    | 0.030069  | 0.02224   | -0.007829         |
| 7        | C    | -0,033274 | -0,052613 | -0,019339         | 7        | H    | 0.03998   | 0.035476  | -0.004504         |
| 8        | H    | 0,065363  | 0,04368   | -0,021683         | 8        | C    | -0.026164 | -0.024703 | 0.001461          |
| 9        | H    | 0,04336   | 0,028488  | -0,014872         | 9        | H    | 0.031213  | 0.03644   | 0.005227          |
| 10       | C    | 0,000142  | 0,00686   | 0,006718          | 10       | C    | 0.207019  | 0.211757  | 0.004738          |
| 11       | N    | -0,139035 | -0,13775  | 0,001285          | 11       | O    | -0.263133 | -0.254841 | 0.008292          |
| 12       | C    | 0,080454  | 0,06257   | -0,017884         | 12       | O    | -0.152313 | -0.155214 | -0.002901         |
| 13       | H    | 0,081455  | 0,068863  | -0,012592         | 13       | H    | 0.13252   | 0.127813  | -0.004707         |

|    |   |           |           |           |    |   |           |           |           |
|----|---|-----------|-----------|-----------|----|---|-----------|-----------|-----------|
| 14 | N | -0,020793 | -0,035219 | -0,014426 | 14 | C | -0.051941 | -0.05301  | -0.001069 |
| 15 | H | 0,172307  | 0,158908  | -0,013399 | 15 | H | 0.03782   | 0.029807  | -0.008013 |
| 16 | C | -0,003802 | -0,020953 | -0,017151 | 16 | H | 0.030098  | 0.01841   | -0.011688 |
| 17 | H | 0,065929  | 0,055465  | -0,010464 | 17 | C | 0.059694  | -0.015455 | -0.075149 |
| 18 | C | -0,021746 | -0,023747 | -0,002001 | 18 | C | 0.151455  | 0.065593  | -0.085862 |
| 19 | C | -0,040522 | -0,042828 | -0,002306 | 19 | C | -0.034812 | -0.06785  | -0.033038 |
| 20 | H | 0,028737  | 0,025966  | -0,002771 | 20 | C | 0.028069  | -0.062509 | -0.090578 |
| 21 | H | 0,049985  | 0,035921  | -0,014064 | 21 | C | -0.027799 | -0.070804 | -0.043005 |
| 22 | C | -0,021824 | -0,019933 | 0,001891  | 22 | C | 0.139135  | 0.067708  | -0.071427 |
| 23 | C | -0,039858 | -0,043884 | -0,004026 | 23 | H | 0.058338  | 0.032953  | -0.025385 |
| 24 | H | 0,036535  | 0,029769  | -0,006766 | 24 | H | 0.07532   | 0.033672  | -0.041648 |
| 25 | H | 0,040566  | 0,035073  | -0,005493 | 25 | H | 0.072558  | 0.038516  | -0.034042 |
| 26 | C | -0,080811 | -0,08582  | -0,005009 | 26 | O | -0.098089 | -0.190132 | -0.092043 |
| 27 | H | 0,037755  | 0,035072  | -0,002683 | 27 | H | 0.212623  | 0.173552  | -0.039071 |
| 28 | H | 0,047474  | 0,036119  | -0,011355 | 28 | C | -0.044079 | -0.047594 | -0.003515 |
| 29 | H | 0,030137  | 0,026367  | -0,00377  | 29 | H | 0.035781  | 0.02732   | -0.008461 |
| 30 | H | 0,039114  | 0,04167   | 0,002556  | 30 | C | 0.014951  | 0.014741  | -0.00021  |
| 31 | C | 0,216848  | 0,219694  | 0,002846  | 31 | C | 0.214028  | 0.211239  | -0.002789 |
| 32 | O | -0,258347 | -0,256627 | 0,00172   | 32 | O | -0.158112 | -0.167351 | -0.009239 |
| 33 | O | -0,160953 | -0,169596 | -0,008643 | 33 | H | 0.174329  | 0.167876  | -0.006453 |
| 34 | H | 0,185973  | 0,178706  | -0,007267 | 34 | O | -0.24728  | -0.232975 | 0.014305  |
| 35 | C | 0,017125  | 0,017731  | 0,000606  | 35 | C | -0.049374 | -0.051379 | -0.002005 |
| 36 | C | 0,223453  | 0,222844  | -0,000609 | 36 | H | 0.053805  | 0.045528  | -0.008277 |
| 37 | O | -0,211887 | -0,238188 | -0,026301 | 37 | H | 0.051958  | 0.051199  | -0.000759 |
| 38 | O | -0,082579 | -0,086184 | -0,003605 | 38 | C | 0.215837  | 0.215238  | -0.000599 |
| 39 | C | -0,079015 | -0,084888 | -0,005873 | 39 | O | -0.233351 | -0.249029 | -0.015678 |
| 40 | H | 0,049061  | 0,038044  | -0,011017 | 40 | O | -0.100104 | -0.093388 | 0.006716  |
| 41 | H | 0,036662  | 0,03402   | -0,002642 | 41 | C | -0.072779 | -0.077778 | -0.004999 |
| 42 | H | 0,041155  | 0,031661  | -0,009494 | 42 | H | 0.047967  | 0.044214  | -0.003753 |
| 43 | H | 0,043874  | 0,033556  | -0,010318 | 43 | H | 0.042325  | 0.033908  | -0.008417 |
| 44 | C | -0,054837 | -0,056851 | -0,002014 | 44 | H | 0.047833  | 0.041756  | -0.006077 |
| 45 | H | 0,044981  | 0,031652  | -0,013329 | 45 | O | -0.045872 | -0.133345 | -0.087473 |
| 46 | H | 0,010944  | 0,015616  | 0,004672  | 46 | C | 0.024478  | 0.001945  | -0.022533 |
| 47 | C | -0,043807 | -0,049132 | -0,005325 | 47 | H | 0.043652  | 0.025466  | -0.018186 |
| 48 | H | 0,051394  | 0,041914  | -0,00948  | 48 | H | 0.072531  | 0.046704  | -0.025827 |
| 49 | H | 0,058197  | 0,04848   | -0,009717 | 49 | H | 0.054006  | 0.029307  | -0.024699 |
| 50 | C | 0,215253  | 0,212636  | -0,002617 | 50 | H | 0.037081  | 0.032958  | -0.004123 |
| 51 | O | -0,27134  | -0,272408 | -0,001068 | 51 | C | -0.036682 | -0.047559 | -0.010877 |
| 52 | O | -0,172428 | -0,181997 | -0,009569 | 52 | H | 0.055442  | 0.032821  | -0.022621 |
| 53 | H | 0,162527  | 0,159431  | -0,003096 | 53 | H | 0.042688  | 0.027224  | -0.015464 |
| 54 | C | 0,236941  | 0,210344  | -0,026597 | 54 | C | -0.0169   | -0.020948 | -0.004048 |
| 55 | O | -0,182312 | -0,256501 | -0,074189 | 55 | H | 0.011993  | 0.011798  | -0.000195 |
| 56 | O | -0,149183 | -0,183591 | -0,034408 | 56 | C | 0.068971  | 0.066367  | -0.002604 |
| 57 | H | 0,113553  | 0,10689   | -0,006663 | 57 | C | -0.066705 | -0.060611 | 0.006094  |
| 58 | C | 0,087029  | 0,070773  | -0,016256 | 58 | H | 0.064407  | 0.061823  | -0.002584 |
| 59 | C | -0,033566 | -0,089421 | -0,055855 | 59 | H | 0.045502  | 0.04948   | 0.003978  |
| 60 | H | 0,06346   | 0,044548  | -0,018912 | 60 | C | 0.032449  | 0.0292    | -0.003249 |
| 61 | H | 0,067705  | 0,046641  | -0,021064 | 61 | H | 0.055007  | 0.049855  | -0.005152 |
| 62 | C | 0,03174   | 0,03058   | -0,00116  | 62 | H | 0.051936  | 0.044841  | -0.007095 |
| 63 | H | 0,059639  | 0,04713   | -0,012509 | 63 | O | -0.126422 | -0.129187 | -0.002765 |
| 64 | H | 0,035015  | 0,03542   | 0,000405  | 64 | C | 0.207284  | 0.208002  | 0.000718  |
| 65 | O | -0,117312 | -0,10679  | 0,010522  | 65 | C | -0.004168 | -0.001194 | 0.002974  |
| 66 | C | 0,213433  | 0,211891  | -0,001542 | 66 | C | -0.065338 | -0.072871 | -0.007533 |
| 67 | O | -0,237421 | -0,260766 | -0,023345 | 67 | H | 0.048922  | 0.043339  | -0.005583 |
| 68 | C | -0,00657  | -0,012477 | -0,005907 | 68 | H | 0.039447  | 0.035187  | -0.00426  |
| 69 | C | -0,072362 | -0,067814 | 0,004548  | 69 | C | -0.085648 | -0.085768 | -0.00012  |
| 70 | H | 0,023652  | 0,033636  | 0,009984  | 70 | H | 0.040036  | 0.03551   | -0.004526 |
| 71 | H | 0,046989  | 0,037665  | -0,009324 | 71 | H | 0.031149  | 0.041685  | 0.010536  |
| 72 | C | -0,079067 | -0,085627 | -0,00656  | 72 | H | 0.043103  | 0.037301  | -0.005802 |
| 73 | H | 0,040109  | 0,03336   | -0,006749 | 73 | O | -0.260316 | -0.255971 | 0.004345  |
| 74 | H | 0,056336  | 0,046111  | -0,010225 |    |   |           |           |           |
| 75 | H | 0,041007  | 0,032491  | -0,008516 |    |   |           |           |           |
| 76 | C | 0,198874  | 0,167997  | -0,030877 |    |   |           |           |           |

| MBA-1- GM2 |      |           |           |                   | MH-1- GM3 |      |           |           |                   |
|------------|------|-----------|-----------|-------------------|-----------|------|-----------|-----------|-------------------|
| #          | atom | qN-1      | qN        | (f <sup>-</sup> ) | #         | atom | qN-1      | qN        | (f <sup>-</sup> ) |
| 1          | H    | 0,052921  | 0,036727  | -0,016194         | 1         | C    | 0,18627   | 0,183882  | -0,002388         |
| 2          | C    | -0,077508 | -0,088412 | -0,010904         | 2         | O    | -0,234098 | -0,233428 | 0,00067           |
| 3          | H    | 0,037614  | 0,028684  | -0,00893          | 3         | N    | -0,072536 | -0,077668 | -0,005132         |
| 4          | H    | 0,032575  | 0,02589   | -0,006685         | 4         | H    | 0,107678  | 0,104318  | -0,00336          |
| 5          | C    | -0,035602 | -0,043492 | -0,00789          | 5         | C    | 0,034813  | 0,027719  | -0,007094         |
| 6          | H    | 0,039131  | 0,030891  | -0,00824          | 6         | H    | 0,044083  | 0,040491  | -0,003592         |
| 7          | H    | 0,039608  | 0,034231  | -0,005377         | 7         | C    | -0,039818 | -0,04855  | -0,008732         |
| 8          | C    | 0,018743  | 0,00995   | -0,008793         | 8         | H    | 0,059973  | 0,045134  | -0,014839         |
| 9          | C    | -0,080544 | -0,085308 | -0,004764         | 9         | H    | 0,060176  | 0,049287  | -0,010889         |
| 10         | H    | 0,049944  | 0,034373  | -0,015571         | 10        | C    | 0,050021  | 0,003889  | -0,046132         |
| 11         | H    | 0,043383  | 0,036165  | -0,007218         | 11        | N    | -0,159946 | -0,18048  | -0,020534         |
| 12         | H    | 0,030903  | 0,029815  | -0,001088         | 12        | C    | 0,102237  | 0,049693  | -0,052544         |
| 13         | C    | 0,175507  | 0,176536  | 0,001029          | 13        | H    | 0,088607  | 0,065271  | -0,023336         |
| 14         | O    | -0,267155 | -0,267065 | 9E-05             | 14        | N    | -0,021287 | -0,044768 | -0,023481         |
| 15         | N    | -0,062252 | -0,076505 | -0,014253         | 15        | H    | 0,176786  | 0,157717  | -0,019069         |
| 16         | H    | 0,121238  | 0,11395   | -0,007288         | 16        | C    | 0,038401  | -0,030952 | -0,069353         |
| 17         | C    | 0,015244  | 0,0108    | -0,004444         | 17        | H    | 0,08876   | 0,062104  | -0,026656         |
| 18         | H    | 0,055168  | 0,043571  | -0,011597         | 18        | C    | 0,011913  | 0,012513  | 0,0006            |
| 19         | H    | 0,043537  | 0,043938  | 0,000401          | 19        | C    | -0,044266 | -0,043741 | 0,000525          |
| 20         | C    | -0,046323 | -0,051762 | -0,005439         | 20        | H    | 0,027847  | 0,031792  | 0,003945          |
| 21         | H    | 0,062443  | 0,052733  | -0,00971          | 21        | H    | 0,018459  | 0,020802  | 0,002343          |
| 22         | H    | 0,052305  | 0,044011  | -0,008294         | 22        | C    | -0,05378  | -0,055699 | -0,001919         |
| 23         | C    | 0,212971  | 0,21177   | -0,001201         | 23        | H    | 0,031955  | 0,028929  | -0,003026         |
| 24         | O    | -0,283803 | -0,284687 | -0,000884         | 24        | H    | 0,019425  | 0,024721  | 0,005296          |
| 25         | O    | -0,184926 | -0,187325 | -0,002399         | 25        | C    | -0,023206 | -0,024385 | -0,001179         |
| 26         | H    | 0,123943  | 0,124167  | 0,000224          | 26        | C    | -0,039108 | -0,041875 | -0,002767         |
| 27         | C    | -0,031801 | -0,045629 | -0,013828         | 27        | H    | 0,043622  | 0,036751  | -0,006871         |
| 28         | H    | 0,046801  | 0,031573  | -0,015228         | 28        | H    | 0,035326  | 0,029823  | -0,005503         |
| 29         | H    | 0,041125  | 0,032211  | -0,008914         | 29        | C    | 0,01424   | 0,013416  | -0,000824         |
| 30         | C    | 0,01976   | -0,022903 | -0,042663         | 30        | C    | 0,222624  | 0,218095  | -0,004529         |
| 31         | C    | -0,051544 | -0,055072 | -0,003528         | 31        | O    | -0,252497 | -0,247226 | 0,005271          |
| 32         | H    | 0,041919  | 0,021583  | -0,020336         | 32        | O    | -0,134159 | -0,148051 | -0,013892         |
| 33         | H    | 0,026727  | 0,023701  | -0,003026         | 33        | H    | 0,200181  | 0,194574  | -0,005607         |
| 34         | C    | 0,014707  | 0,017611  | 0,002904          | 34        | C    | -0,086164 | -0,090577 | -0,004413         |
| 35         | C    | 0,23103   | 0,232651  | 0,001621          | 35        | H    | 0,044112  | 0,037279  | -0,006833         |
| 36         | O    | -0,199977 | -0,221051 | -0,021074         | 36        | H    | 0,035119  | 0,028458  | -0,006661         |
| 37         | O    | -0,098088 | -0,089085 | 0,009003          | 37        | H    | 0,035774  | 0,031987  | -0,003787         |
| 38         | C    | -0,086155 | -0,088114 | -0,001959         | 38        | C    | -0,054127 | -0,054928 | -0,000801         |
| 39         | H    | 0,054548  | 0,03277   | -0,021778         | 39        | H    | 0,050578  | 0,044567  | -0,006011         |
| 40         | H    | 0,035747  | 0,038362  | 0,002615          | 40        | H    | 0,034204  | 0,039679  | 0,005475          |
| 41         | H    | 0,032089  | 0,037176  | 0,005087          | 41        | C    | 0,225675  | 0,222916  | -0,002759         |
| 42         | C    | -0,054545 | -0,057222 | -0,002677         | 42        | O    | -0,214547 | -0,228958 | -0,014411         |
| 43         | H    | 0,05636   | 0,047618  | -0,008742         | 43        | O    | -0,108443 | -0,120709 | -0,012266         |
| 44         | H    | 0,029128  | 0,031157  | 0,002029          | 44        | H    | 0,04653   | 0,040374  | -0,006156         |
| 45         | C    | 0,232688  | 0,229624  | -0,003064         | 45        | C    | 0,203901  | 0,202558  | -0,001343         |
| 46         | O    | -0,216145 | -0,228772 | -0,012627         | 46        | O    | -0,262949 | -0,282007 | -0,019058         |
| 47         | O    | -0,159023 | -0,17411  | -0,015087         | 47        | O    | -0,17444  | -0,175406 | -0,000966         |
| 48         | H    | 0,143225  | 0,139302  | -0,003923         | 48        | H    | 0,120238  | 0,123779  | 0,003541          |
| 49         | H    | 0,058616  | 0,027016  | -0,0316           | 49        | C    | -0,080005 | -0,082452 | -0,002447         |
| 50         | C    | 0,300101  | 0,209227  | -0,090874         | 50        | H    | 0,041164  | 0,036552  | -0,004612         |
| 51         | O    | 0,059582  | -0,266526 | -0,326108         | 51        | H    | 0,034745  | 0,031721  | -0,003024         |
| 52         | O    | -0,092371 | -0,190664 | -0,098293         | 52        | H    | 0,034941  | 0,029809  | -0,005132         |
| 53         | H    | 0,159753  | 0,128048  | -0,031705         | 53        | C    | 0,21634   | 0,207811  | -0,008529         |
| 54         | C    | 0,067655  | 0,070503  | 0,002848          | 54        | O    | -0,238397 | -0,267148 | -0,028751         |
| 55         | C    | -0,062126 | -0,078067 | -0,015941         | 55        | O    | -0,167877 | -0,182307 | -0,014443         |
| 56         | H    | 0,067181  | 0,054642  | -0,012539         | 56        | H    | 0,130841  | 0,129534  | -0,001307         |
| 57         | H    | 0,06142   | 0,057752  | -0,003668         | 57        | C    | -0,081996 | -0,085598 | -0,003602         |
| 58         | C    | 0,035453  | 0,031511  | -0,003942         | 58        | H    | 0,040695  | 0,035461  | -0,005234         |
| 59         | H    | 0,065959  | 0,056168  | -0,009791         | 59        | H    | 0,032571  | 0,031208  | -0,001363         |



|    |   |           |           |           |    |   |           |           |           |
|----|---|-----------|-----------|-----------|----|---|-----------|-----------|-----------|
| 60 | H | 0,046711  | 0,043012  | -0,003699 | 60 | H | 0,044528  | 0,037911  | -0,006617 |
| 61 | O | -0,114326 | -0,119036 | -0,00471  | 61 | C | 0,091949  | 0,071599  | -0,02035  |
| 62 | C | 0,213185  | 0,213555  | 0,00037   | 62 | C | -0,046756 | -0,100513 | -0,053757 |
| 63 | O | -0,249346 | -0,251066 | -0,00172  | 63 | H | 0,06678   | 0,048225  | -0,018555 |
| 64 | C | -0,006013 | -0,007051 | -0,001038 | 64 | H | 0,068306  | 0,04855   | -0,019756 |
| 65 | C | -0,045922 | -0,050966 | -0,005044 | 65 | C | 0,036285  | 0,02646   | -0,009825 |
| 66 | H | 0,056188  | 0,051062  | -0,005126 | 66 | H | 0,062362  | 0,048866  | -0,013496 |
| 67 | H | 0,052512  | 0,049517  | -0,002995 | 67 | H | 0,053833  | 0,041791  | -0,012042 |
| 68 | C | -0,079553 | -0,082065 | -0,002512 | 68 | O | -0,116388 | -0,12346  | -0,007072 |
| 69 | H | 0,055271  | 0,043206  | -0,012065 | 69 | C | 0,218518  | 0,211501  | -0,007017 |
| 70 | H | 0,02879   | 0,033109  | 0,004319  | 70 | C | 0,064231  | 0,001955  | -0,062276 |
| 71 | H | 0,043521  | 0,039943  | -0,003578 | 71 | C | 0,009267  | -0,076236 | -0,085503 |
|    |   |           |           |           | 72 | H | 0,056288  | 0,034059  | -0,022229 |
|    |   |           |           |           | 73 | H | 0,060048  | 0,035341  | -0,024707 |
|    |   |           |           |           | 74 | C | -0,067594 | -0,087382 | -0,019788 |
|    |   |           |           |           | 75 | H | 0,06547   | 0,039119  | -0,026351 |
|    |   |           |           |           | 76 | H | 0,057861  | 0,034863  | -0,022998 |
|    |   |           |           |           | 77 | H | 0,045556  | 0,033695  | -0,011861 |
|    |   |           |           |           | 78 | O | -0,218009 | -0,254322 | -0,036313 |

| NMP-1- GM2 |      |           |           |                   | NVC-1- GM2 |      |           |           |                   |
|------------|------|-----------|-----------|-------------------|------------|------|-----------|-----------|-------------------|
| #          | atom | qN-1      | qN        | (f <sup>-</sup> ) | #          | atom | qN-1      | qN        | (f <sup>-</sup> ) |
| 1          | C    | -0,084326 | -0,092437 | -0,008111         | 1          | C    | 0,044426  | 0,029616  | -0,01481          |
| 2          | H    | 0,036433  | 0,030017  | -0,006416         | 2          | N    | 0,138591  | -0,044366 | -0,182957         |
| 3          | H    | 0,03113   | 0,023096  | -0,008034         | 3          | C    | 0,026796  | -0,000445 | -0,027241         |
| 4          | C    | 0,013458  | 0,013966  | 0,000508          | 4          | H    | 0,068279  | 0,031418  | -0,036861         |
| 5          | C    | -0,045534 | -0,048593 | -0,003059         | 5          | H    | 0,059662  | 0,033825  | -0,025837         |
| 6          | H    | 0,04988   | 0,030426  | -0,019454         | 6          | C    | -0,027672 | -0,053476 | -0,025804         |
| 7          | H    | 0,027922  | 0,025143  | -0,002779         | 7          | H    | 0,041086  | 0,027086  | -0,014            |
| 8          | C    | 0,205369  | 0,170159  | -0,03521          | 8          | H    | 0,065726  | 0,032772  | -0,032954         |
| 9          | O    | -0,144501 | -0,266636 | -0,122135         | 9          | C    | -0,040507 | -0,049588 | -0,009081         |
| 10         | N    | 0,1057    | -0,034517 | -0,140217         | 10         | H    | 0,042975  | 0,028279  | -0,014696         |
| 11         | C    | 0,046933  | 0,0185    | -0,028433         | 11         | H    | 0,055065  | 0,030801  | -0,024264         |
| 12         | C    | -0,035595 | -0,052786 | -0,017191         | 12         | C    | -0,038545 | -0,04618  | -0,007635         |
| 13         | C    | -0,033153 | -0,046561 | -0,013408         | 13         | H    | 0,034357  | 0,027681  | -0,006676         |
| 14         | C    | 0,029254  | 0,001419  | -0,027835         | 14         | H    | 0,057852  | 0,033397  | -0,024455         |
| 15         | H    | 0,052222  | 0,031802  | -0,02042          | 15         | C    | -0,05068  | -0,06051  | -0,00983          |
| 16         | H    | 0,064427  | 0,040961  | -0,023466         | 16         | H    | 0,047071  | 0,031314  | -0,015757         |
| 17         | H    | 0,048534  | 0,03401   | -0,014524         | 17         | H    | 0,055721  | 0,034408  | -0,021313         |
| 18         | H    | 0,067792  | 0,040698  | -0,027094         | 18         | C    | 0,209109  | 0,169617  | -0,039492         |
| 19         | H    | 0,070216  | 0,035035  | -0,035181         | 19         | O    | -0,132798 | -0,292248 | -0,15945          |
| 20         | H    | 0,069621  | 0,029968  | -0,039653         | 20         | C    | -0,026886 | -0,04486  | -0,017974         |
| 21         | C    | -0,040815 | -0,043894 | -0,003079         | 21         | H    | 0,046106  | 0,030663  | -0,015443         |
| 22         | H    | 0,050677  | 0,033861  | -0,016816         | 22         | H    | 0,058361  | 0,03332   | -0,025041         |
| 23         | H    | 0,030288  | 0,027262  | -0,003026         | 23         | C    | -0,022963 | -0,021653 | 0,00131           |
| 24         | C    | -0,031957 | -0,03011  | 0,001847          | 24         | H    | 0,028774  | 0,033841  | 0,005067          |
| 25         | C    | 0,204963  | 0,210453  | 0,00549           | 25         | C    | 0,219417  | 0,216897  | -0,00252          |
| 26         | O    | -0,248368 | -0,258478 | -0,01011          | 26         | O    | -0,249809 | -0,275706 | -0,025897         |
| 27         | O    | -0,164415 | -0,162987 | 0,001428          | 27         | O    | -0,172068 | -0,175073 | -0,003005         |
| 28         | H    | 0,153338  | 0,149143  | -0,004195         | 28         | H    | 0,196621  | 0,183667  | -0,012954         |
| 29         | H    | 0,024687  | 0,024095  | -0,000592         | 29         | C    | -0,049835 | -0,049405 | 0,00043           |
| 30         | C    | -0,038903 | -0,042228 | -0,003325         | 30         | H    | 0,045047  | 0,0336    | -0,011447         |
| 31         | H    | 0,033879  | 0,027674  | -0,006205         | 31         | H    | 0,019956  | 0,026774  | 0,006818          |
| 32         | H    | 0,039956  | 0,03558   | -0,004376         | 32         | C    | 0,016814  | 0,017842  | 0,001028          |
| 33         | C    | 0,014763  | 0,014485  | -0,000278         | 33         | C    | -0,092312 | -0,096357 | -0,004045         |
| 34         | C    | -0,052697 | -0,051991 | 0,000706          | 34         | H    | 0,027211  | 0,027552  | 0,000341          |
| 35         | H    | 0,05434   | 0,051987  | -0,002353         | 35         | H    | 0,040093  | 0,032932  | -0,007161         |
| 36         | H    | 0,037201  | 0,042787  | 0,005586          | 36         | H    | 0,038823  | 0,029631  | -0,009192         |
| 37         | C    | 0,224653  | 0,223429  | -0,001224         | 37         | C    | 0,217757  | 0,219508  | 0,001751          |
| 38         | O    | -0,258268 | -0,26555  | -0,007282         | 38         | O    | -0,247645 | -0,231853 | 0,015792          |
| 39         | O    | -0,16992  | -0,173878 | -0,003958         | 39         | O    | -0,088427 | -0,095919 | -0,007492         |
| 40         | H    | 0,070502  | 0,035754  | -0,034748         | 40         | C    | -0,044279 | -0,04742  | -0,003141         |

|    |   |           |           |           |    |   |           |           |           |
|----|---|-----------|-----------|-----------|----|---|-----------|-----------|-----------|
| 41 | C | 0,244891  | 0,203726  | -0,041165 | 41 | H | 0,059047  | 0,051499  | -0,007548 |
| 42 | O | -0,15966  | -0,274023 | -0,114363 | 42 | H | 0,042168  | 0,042193  | 2,5E-05   |
| 43 | O | -0,141212 | -0,197444 | -0,056232 | 43 | C | 0,215415  | 0,21431   | -0,001105 |
| 44 | H | 0,142992  | 0,127369  | -0,015623 | 44 | O | -0,247232 | -0,259825 | -0,012593 |
| 45 | C | -0,081975 | -0,086641 | -0,004666 | 45 | O | -0,178267 | -0,179036 | -0,000769 |
| 46 | H | 0,044254  | 0,033204  | -0,01105  | 46 | C | -0,030718 | -0,050432 | -0,019714 |
| 47 | H | 0,017853  | 0,027427  | 0,009574  | 47 | H | 0,039371  | 0,025135  | -0,014236 |
| 48 | H | 0,051299  | 0,034231  | -0,017068 | 48 | H | 0,061269  | 0,032681  | -0,028588 |
| 49 | H | 0,042848  | 0,023839  | -0,019009 | 49 | C | -0,076847 | -0,086939 | -0,010092 |
| 50 | C | 0,227568  | 0,226727  | -0,000841 | 50 | H | 0,048134  | 0,034137  | -0,013997 |
| 51 | O | -0,241829 | -0,233151 | 0,008678  | 51 | H | 0,023814  | 0,023926  | 0,000112  |
| 52 | O | -0,089544 | -0,094809 | -0,005265 | 52 | H | 0,056307  | 0,03137   | -0,024937 |
| 53 | C | -0,086353 | -0,090677 | -0,004324 | 53 | H | 0,051785  | 0,035973  | -0,015812 |
| 54 | H | 0,035435  | 0,03159   | -0,003845 | 54 | C | 0,073483  | 0,066874  | -0,006609 |
| 55 | H | 0,038455  | 0,03116   | -0,007295 | 55 | C | -0,079382 | -0,075535 | 0,003847  |
| 56 | H | 0,03721   | 0,032799  | -0,004411 | 56 | H | 0,059183  | 0,050311  | -0,008872 |
| 57 | C | 0,065186  | 0,068143  | 0,002957  | 57 | H | 0,041229  | 0,04927   | 0,008041  |
| 58 | C | -0,065    | -0,075575 | -0,010575 | 58 | C | 0,033469  | 0,031359  | -0,00211  |
| 59 | H | 0,059402  | 0,052868  | -0,006534 | 59 | H | 0,058126  | 0,052077  | -0,006049 |
| 60 | H | 0,062446  | 0,05757   | -0,004876 | 60 | H | 0,038849  | 0,03771   | -0,001139 |
| 61 | C | 0,033978  | 0,034092  | 0,000114  | 61 | O | -0,111216 | -0,111412 | -0,000196 |
| 62 | H | 0,060956  | 0,056538  | -0,004418 | 62 | C | 0,221741  | 0,220675  | -0,001066 |
| 63 | H | 0,037124  | 0,044392  | 0,007268  | 63 | O | -0,24388  | -0,248496 | -0,004616 |
| 64 | O | -0,110981 | -0,116741 | -0,00576  | 64 | C | -0,005303 | -0,004553 | 0,00075   |
| 65 | C | 0,218172  | 0,216962  | -0,00121  | 65 | C | -0,051844 | -0,057549 | -0,005705 |
| 66 | C | -0,012041 | -0,008547 | 0,003494  | 66 | H | 0,054163  | 0,047929  | -0,006234 |
| 67 | C | -0,041521 | -0,055238 | -0,013717 | 67 | H | 0,044347  | 0,044918  | 0,000571  |
| 68 | H | 0,057567  | 0,049903  | -0,007664 | 68 | C | -0,083095 | -0,085344 | -0,002249 |
| 69 | H | 0,052619  | 0,047029  | -0,00559  | 69 | H | 0,042969  | 0,037665  | -0,005304 |
| 70 | C | -0,082429 | -0,082359 | 7E-05     | 70 | H | 0,037412  | 0,037756  | 0,000344  |
| 71 | H | 0,034289  | 0,039857  | 0,005568  | 71 | H | 0,041409  | 0,03753   | -0,003879 |
| 72 | H | 0,036133  | 0,038049  | 0,001916  | 72 | H | 0,146785  | 0,142453  | -0,004332 |
| 73 | H | 0,046713  | 0,040711  | -0,006002 |    |   |           |           |           |
| 74 | O | -0,238822 | -0,221999 | 0,016823  |    |   |           |           |           |
| 75 | H | 0,194201  | 0,187835  | -0,006366 |    |   |           |           |           |

| NVP-1- GM2 |      |           |           |                   | ABA-1- GM2 |      |           |           |                   |
|------------|------|-----------|-----------|-------------------|------------|------|-----------|-----------|-------------------|
| #          | atom | qN-1      | qN        | (f <sup>-</sup> ) | #          | atom | qN-1      | qN        | (f <sup>-</sup> ) |
| 1          | C    | 0,208154  | 0,166679  | -0,041475         | 1          | H    | 0,050201  | 0,034388  | -0,015813         |
| 2          | C    | -0,036557 | -0,055587 | -0,01903          | 2          | C    | -0,08232  | -0,088411 | -0,006091         |
| 3          | C    | -0,03512  | -0,050516 | -0,015396         | 3          | H    | 0,026699  | 0,027912  | 0,001213          |
| 4          | C    | 0,033986  | 0,001151  | -0,032835         | 4          | H    | 0,034486  | 0,02524   | -0,009246         |
| 5          | H    | 0,068157  | 0,044167  | -0,02399          | 5          | C    | -0,04082  | -0,045489 | -0,004669         |
| 6          | H    | 0,068835  | 0,041887  | -0,026948         | 6          | H    | 0,044564  | 0,02844   | -0,016124         |
| 7          | H    | 0,043483  | 0,025981  | -0,017502         | 7          | H    | 0,037102  | 0,034604  | -0,002498         |
| 8          | H    | 0,066048  | 0,037763  | -0,028285         | 8          | C    | -0,016206 | -0,021385 | -0,005179         |
| 9          | H    | 0,074794  | 0,032546  | -0,042248         | 9          | C    | 0,197864  | 0,172155  | -0,025709         |
| 10         | H    | 0,083278  | 0,029153  | -0,054125         | 10         | O    | -0,154318 | -0,273267 | -0,118949         |
| 11         | N    | 0,125007  | -0,045363 | -0,17037          | 11         | N    | -0,005593 | -0,08604  | -0,080447         |
| 12         | O    | -0,124996 | -0,280917 | -0,155921         | 12         | H    | 0,122622  | 0,095627  | -0,026995         |
| 13         | C    | 0,054907  | 0,038006  | -0,016901         | 13         | C    | 0,01448   | 0,001973  | -0,012507         |
| 14         | C    | -0,032699 | -0,048945 | -0,016246         | 14         | H    | 0,045537  | 0,040272  | -0,005265         |
| 15         | H    | 0,046812  | 0,035325  | -0,011487         | 15         | H    | 0,058172  | 0,03195   | -0,026222         |
| 16         | H    | 0,052811  | 0,027605  | -0,025206         | 16         | C    | -0,043038 | -0,051342 | -0,008304         |
| 17         | C    | -0,03276  | -0,032466 | 0,000294          | 17         | H    | 0,074622  | 0,05802   | -0,016602         |
| 18         | H    | 0,016872  | 0,020987  | 0,004115          | 18         | H    | 0,042166  | 0,03995   | -0,002216         |
| 19         | C    | -0,049468 | -0,049772 | -0,000304         | 19         | C    | 0,22922   | 0,228827  | -0,000393         |
| 20         | H    | 0,039373  | 0,029914  | -0,009459         | 20         | O    | -0,238487 | -0,255828 | -0,017341         |
| 21         | H    | 0,015879  | 0,024269  | 0,00839           | 21         | O    | -0,160154 | -0,163046 | -0,002892         |
| 22         | C    | 0,018543  | 0,018044  | -0,000499         | 22         | H    | 0,195177  | 0,184089  | -0,011088         |
| 23         | C    | 0,214281  | 0,210327  | -0,003954         | 23         | C    | -0,041822 | -0,045912 | -0,00409          |
| 24         | O    | -0,164271 | -0,174187 | -0,009916         | 24         | H    | 0,032908  | 0,025573  | -0,007335         |

|    |   |           |           |           |    |   |           |           |           |
|----|---|-----------|-----------|-----------|----|---|-----------|-----------|-----------|
| 25 | H | 0,186126  | 0,1735    | -0,012626 | 25 | H | 0,052246  | 0,036807  | -0,015439 |
| 26 | O | -0,240015 | -0,259486 | -0,019471 | 26 | C | -0,035994 | -0,034123 | 0,001871  |
| 27 | C | 0,218504  | 0,219381  | 0,000877  | 27 | H | 0,009769  | 0,017363  | 0,007594  |
| 28 | O | -0,216762 | -0,234284 | -0,017522 | 28 | C | 0,215065  | 0,21427   | -0,000795 |
| 29 | O | -0,094856 | -0,089381 | 0,005475  | 29 | O | -0,236874 | -0,257912 | -0,021038 |
| 30 | C | -0,078763 | -0,083197 | -0,004434 | 30 | O | -0,171333 | -0,169171 | 0,002162  |
| 31 | H | 0,031026  | 0,030986  | -4E-05    | 31 | H | 0,191155  | 0,181256  | -0,009899 |
| 32 | H | 0,044947  | 0,038297  | -0,00665  | 32 | C | -0,052166 | -0,053717 | -0,001551 |
| 33 | H | 0,048075  | 0,036765  | -0,01131  | 33 | H | 0,030434  | 0,030699  | 0,000265  |
| 34 | C | -0,048902 | -0,049524 | -0,000622 | 34 | H | 0,043734  | 0,031178  | -0,012556 |
| 35 | H | 0,034627  | 0,040337  | 0,00571   | 35 | C | 0,016858  | 0,016174  | -0,000684 |
| 36 | H | 0,056858  | 0,045104  | -0,011754 | 36 | C | 0,224834  | 0,216534  | -0,0083   |
| 37 | C | 0,215836  | 0,21559   | -0,000246 | 37 | O | -0,223238 | -0,252927 | -0,029689 |
| 38 | O | -0,161661 | -0,145089 | 0,016572  | 38 | O | -0,070455 | -0,093687 | -0,023232 |
| 39 | H | 0,146095  | 0,146624  | 0,000529  | 39 | C | -0,046204 | -0,050871 | -0,004667 |
| 40 | O | -0,241133 | -0,263989 | -0,022856 | 40 | H | 0,063549  | 0,054927  | -0,008622 |
| 41 | H | 0,076475  | 0,031875  | -0,0446   | 41 | H | 0,054151  | 0,04457   | -0,009581 |
| 42 | C | -0,044199 | -0,049232 | -0,005033 | 42 | C | -0,073061 | -0,078987 | -0,005926 |
| 43 | H | 0,037229  | 0,028829  | -0,0084   | 43 | H | 0,040421  | 0,036757  | -0,003664 |
| 44 | H | 0,040853  | 0,026917  | -0,013936 | 44 | H | 0,045817  | 0,0385    | -0,007317 |
| 45 | C | -0,06944  | -0,081669 | -0,012229 | 45 | H | 0,050162  | 0,038123  | -0,012039 |
| 46 | H | 0,043597  | 0,032117  | -0,01148  | 46 | C | 0,226619  | 0,222517  | -0,004102 |
| 47 | H | 0,0561    | 0,035203  | -0,020897 | 47 | O | -0,245753 | -0,233393 | 0,01236   |
| 48 | H | 0,043183  | 0,032763  | -0,01042  | 48 | O | -0,159587 | -0,174218 | -0,014631 |
| 49 | C | 0,07209   | 0,076053  | 0,003963  | 49 | H | 0,148826  | 0,144238  | -0,004588 |
| 50 | C | -0,088306 | -0,100736 | -0,01243  | 50 | H | 0,034392  | 0,034042  | -0,00035  |
| 51 | H | 0,047508  | 0,042676  | -0,004832 | 51 | C | 0,145071  | 0,070141  | -0,07493  |
| 52 | H | 0,057843  | 0,047873  | -0,00997  | 52 | C | 0,034476  | -0,086918 | -0,121394 |
| 53 | C | 0,033702  | 0,031347  | -0,002355 | 53 | H | 0,085608  | 0,047536  | -0,038072 |
| 54 | H | 0,056794  | 0,049032  | -0,007762 | 54 | H | 0,084296  | 0,048804  | -0,035492 |
| 55 | H | 0,046994  | 0,043453  | -0,003541 | 55 | C | 0,035184  | 0,025257  | -0,009927 |
| 56 | O | -0,117784 | -0,113326 | 0,004458  | 56 | H | 0,066709  | 0,044653  | -0,022056 |
| 57 | C | 0,208178  | 0,205728  | -0,00245  | 57 | H | 0,045158  | 0,031979  | -0,013179 |
| 58 | O | -0,240441 | -0,262036 | -0,021595 | 58 | O | -0,106539 | -0,111243 | -0,004704 |
| 59 | C | 0,009265  | -0,00923  | -0,018495 | 59 | C | 0,213992  | 0,211713  | -0,002279 |
| 60 | C | -0,061609 | -0,050878 | 0,010731  | 60 | O | -0,243564 | -0,264401 | -0,020837 |
| 61 | H | 0,033377  | 0,038273  | 0,004896  | 61 | C | -0,0039   | -0,011731 | -0,007831 |
| 62 | H | 0,040438  | 0,04468   | 0,004242  | 62 | C | -0,06083  | -0,067882 | -0,007052 |
| 63 | C | -0,07935  | -0,085551 | -0,006201 | 63 | H | 0,024916  | 0,032616  | 0,0077    |
| 64 | H | 0,046352  | 0,038666  | -0,007686 | 64 | H | 0,055527  | 0,04167   | -0,013857 |
| 65 | H | 0,055909  | 0,042564  | -0,013345 | 65 | C | -0,076672 | -0,084543 | -0,007871 |
| 66 | H | 0,039811  | 0,036816  | -0,002995 | 66 | H | 0,047588  | 0,037686  | -0,009902 |
|    |   |           |           |           | 67 | H | 0,048931  | 0,04093   | -0,008001 |
|    |   |           |           |           | 68 | H | 0,047668  | 0,036531  | -0,011137 |

| AG-1- GM1 |      |           |           |                   | MG-1- GM1 |      |           |           |                   |
|-----------|------|-----------|-----------|-------------------|-----------|------|-----------|-----------|-------------------|
| #         | atom | qN-1      | qN        | (f <sup>-</sup> ) | #         | atom | qN-1      | qN        | (f <sup>-</sup> ) |
| 1         | H    | 0.038873  | 0.033745  | -0.005128         | 1         | H    | 0.046874  | 0.036335  | -0.010539         |
| 2         | C    | -0.078059 | -0.082626 | -0.004567         | 2         | C    | -0.079469 | -0.085103 | -0.005634         |
| 3         | H    | 0.041665  | 0.034137  | -0.007528         | 3         | H    | 0.034976  | 0.028261  | -0.006715         |
| 4         | H    | 0.031591  | 0.028117  | -0.003474         | 4         | H    | 0.031715  | 0.028559  | -0.003156         |
| 5         | C    | -0.049409 | -0.050288 | -0.000879         | 5         | C    | -0.04025  | -0.043008 | -0.002758         |
| 6         | H    | 0.024431  | 0.024423  | -8E-06            | 6         | H    | 0.035261  | 0.029113  | -0.006148         |
| 7         | H    | 0.031934  | 0.029678  | -0.002256         | 7         | H    | 0.034991  | 0.034005  | -0.000986         |
| 8         | C    | -0.017538 | -0.018979 | -0.001441         | 8         | C    | 0.00963   | 0.010698  | 0.001068          |
| 9         | C    | 0.169693  | 0.164259  | -0.005434         | 9         | C    | 0.16592   | 0.16648   | 0.00056           |
| 10        | O    | -0.293573 | -0.275207 | 0.018366          | 10        | O    | -0.267089 | -0.259093 | 0.007996          |
| 11        | N    | -0.080566 | -0.087737 | -0.007171         | 11        | N    | -0.075908 | -0.085315 | -0.009407         |
| 12        | H    | 0.126392  | 0.11746   | -0.008932         | 12        | H    | 0.13383   | 0.123718  | -0.010112         |
| 13        | C    | -0.00258  | -0.002533 | 4.7E-05           | 13        | C    | 0.005778  | 0.003548  | -0.00223          |
| 14        | H    | 0.025128  | 0.038897  | 0.013769          | 14        | H    | 0.069132  | 0.056919  | -0.012213         |
| 15        | H    | 0.064364  | 0.053812  | -0.010552         | 15        | H    | 0.035508  | 0.048213  | 0.012705          |

|    |   |           |           |           |    |   |           |           |           |
|----|---|-----------|-----------|-----------|----|---|-----------|-----------|-----------|
| 16 | C | 0.216873  | 0.213234  | -0.003639 | 16 | C | 0.212602  | 0.212068  | -0.000534 |
| 17 | O | -0.285424 | -0.27668  | 0.008744  | 17 | O | -0.275852 | -0.282984 | -0.007132 |
| 18 | O | -0.164011 | -0.18257  | -0.018559 | 18 | O | -0.17381  | -0.182469 | -0.008659 |
| 19 | H | 0.198133  | 0.187434  | -0.010699 | 19 | H | 0.197721  | 0.187676  | -0.010045 |
| 20 | C | -0.040605 | -0.042372 | -0.001767 | 20 | C | -0.041695 | -0.044049 | -0.002354 |
| 21 | H | 0.038043  | 0.040678  | 0.002635  | 21 | H | 0.032101  | 0.034035  | 0.001934  |
| 22 | H | 0.036432  | 0.02777   | -0.008662 | 22 | H | 0.043671  | 0.030449  | -0.013222 |
| 23 | C | -0.023253 | -0.023821 | -0.000568 | 23 | C | -0.024453 | -0.027469 | -0.003016 |
| 24 | H | 0.034777  | 0.032003  | -0.002774 | 24 | H | 0.03588   | 0.024204  | -0.011676 |
| 25 | C | 0.215202  | 0.211883  | -0.003319 | 25 | C | 0.227204  | 0.21198   | -0.015224 |
| 26 | O | -0.244499 | -0.220666 | 0.023833  | 26 | O | -0.202997 | -0.242233 | -0.039236 |
| 27 | O | -0.091511 | -0.096706 | -0.005195 | 27 | O | -0.021869 | -0.086167 | -0.064298 |
| 28 | C | -0.051978 | -0.052677 | -0.000699 | 28 | C | -0.042891 | -0.043593 | -0.000702 |
| 29 | H | 0.03139   | 0.027988  | -0.003402 | 29 | H | 0.046688  | 0.034509  | -0.012179 |
| 30 | H | 0.033491  | 0.033629  | 0.000138  | 30 | H | 0.04107   | 0.043257  | 0.002187  |
| 31 | C | 0.014515  | 0.014208  | -0.000307 | 31 | C | 0.014267  | 0.015091  | 0.000824  |
| 32 | C | 0.228504  | 0.228376  | -0.000128 | 32 | C | 0.230087  | 0.229476  | -0.000611 |
| 33 | O | -0.236658 | -0.240582 | -0.003924 | 33 | O | -0.223977 | -0.22579  | -0.001813 |
| 34 | O | -0.143552 | -0.145698 | -0.002146 | 34 | O | -0.13651  | -0.145641 | -0.009131 |
| 35 | H | 0.202199  | 0.198503  | -0.003696 | 35 | H | 0.205602  | 0.197569  | -0.008033 |
| 36 | C | -0.053532 | -0.05529  | -0.001758 | 36 | C | -0.05175  | -0.054619 | -0.002869 |
| 37 | H | 0.049378  | 0.043154  | -0.006224 | 37 | H | 0.054366  | 0.04769   | -0.006676 |
| 38 | H | 0.050738  | 0.04805   | -0.002688 | 38 | H | 0.056114  | 0.04363   | -0.012484 |
| 39 | C | -0.07559  | -0.078942 | -0.003352 | 39 | C | -0.074921 | -0.08128  | -0.006359 |
| 40 | H | 0.04426   | 0.041943  | -0.002317 | 40 | H | 0.041419  | 0.033624  | -0.007795 |
| 41 | H | 0.044301  | 0.038162  | -0.006139 | 41 | H | 0.047388  | 0.042057  | -0.005331 |
| 42 | H | 0.038894  | 0.035276  | -0.003618 | 42 | H | 0.046562  | 0.03665   | -0.009912 |
| 43 | C | 0.211695  | 0.20975   | -0.001945 | 43 | C | 0.203843  | 0.202575  | -0.001268 |
| 44 | O | -0.271359 | -0.261284 | 0.010075  | 44 | O | -0.267675 | -0.270072 | -0.002397 |
| 45 | O | -0.177907 | -0.17632  | 0.001587  | 45 | O | -0.192193 | -0.187456 | 0.004737  |
| 46 | H | 0.138933  | 0.135881  | -0.003052 | 46 | H | 0.126849  | 0.121313  | -0.005536 |
| 47 | H | 0.05078   | 0.044442  | -0.006338 | 47 | C | -0.085698 | -0.089354 | -0.003656 |
| 48 | C | 0.082399  | 0.086643  | 0.004244  | 48 | H | 0.042368  | 0.032367  | -0.010001 |
| 49 | C | -0.079367 | -0.103717 | -0.02435  | 49 | H | 0.043094  | 0.034469  | -0.008625 |
| 50 | H | 0.052811  | 0.037925  | -0.014886 | 50 | H | 0.028982  | 0.030014  | 0.001032  |
| 51 | H | 0.056822  | 0.047733  | -0.009089 | 51 | C | 0.221803  | 0.078172  | -0.143631 |
| 52 | C | 0.0407    | 0.029466  | -0.011234 | 52 | C | 0.129292  | -0.092349 | -0.221641 |
| 53 | H | 0.059375  | 0.045439  | -0.013936 | 53 | H | 0.097137  | 0.040241  | -0.056896 |
| 54 | H | 0.051595  | 0.040795  | -0.0108   | 54 | H | 0.112435  | 0.047472  | -0.064963 |
| 55 | O | -0.097366 | -0.113551 | -0.016185 | 55 | C | 0.050622  | 0.032756  | -0.017866 |
| 56 | C | 0.225879  | 0.210774  | -0.015105 | 56 | H | 0.070409  | 0.050071  | -0.020338 |
| 57 | O | -0.19268  | -0.270115 | -0.077435 | 57 | H | 0.070249  | 0.03855   | -0.031699 |
| 58 | C | 0.173671  | -0.013623 | -0.187294 | 58 | O | -0.105439 | -0.112771 | -0.007332 |
| 59 | C | 0.168534  | -0.058936 | -0.22747  | 59 | C | 0.215962  | 0.206474  | -0.009488 |
| 60 | H | 0.081275  | 0.027858  | -0.053417 | 60 | C | -0.005645 | -0.011209 | -0.005564 |
| 61 | H | 0.109708  | 0.043389  | -0.066319 | 61 | C | -0.057969 | -0.071686 | -0.013717 |
| 62 | C | -0.041002 | -0.085368 | -0.044366 | 62 | H | 0.028335  | 0.03108   | 0.002745  |
| 63 | H | 0.093046  | 0.035419  | -0.057627 | 63 | H | 0.052084  | 0.037462  | -0.014622 |
| 64 | H | 0.067116  | 0.034696  | -0.03242  | 64 | O | -0.241862 | -0.275261 | -0.033399 |
| 65 | H | 0.096354  | 0.039095  | -0.057259 | 65 | C | -0.078576 | -0.08582  | -0.007244 |
|    |   |           |           |           | 66 | H | 0.045297  | 0.033767  | -0.01153  |
|    |   |           |           |           | 67 | H | 0.048244  | 0.03999   | -0.008254 |
|    |   |           |           |           | 68 | H | 0.045213  | 0.038271  | -0.006942 |

**MGA-1- GM2**

| # | atom | qN-1      | qN        | (f <sup>-</sup> ) | #  | atom | qN-1      | qN        | (f <sup>-</sup> ) |
|---|------|-----------|-----------|-------------------|----|------|-----------|-----------|-------------------|
| 1 | H    | 0,043031  | 0,036047  | -0,006984         | 40 | O    | -0,196744 | -0,194005 | 0,002739          |
| 2 | C    | -0,076643 | -0,080851 | -0,004208         | 41 | H    | 0,118658  | 0,125351  | 0,006693          |
| 3 | H    | 0,036665  | 0,033348  | -0,003317         | 42 | C    | -0,064688 | -0,062204 | 0,002484          |
| 4 | H    | 0,040422  | 0,035583  | -0,004839         | 43 | H    | 0,006248  | 0,018807  | 0,012559          |
| 5 | C    | -0,045542 | -0,046206 | -0,000664         | 44 | H    | 0,029635  | 0,029339  | -0,000296         |
| 6 | H    | 0,024186  | 0,025322  | 0,001136          | 45 | C    | 0,017105  | 0,017653  | 0,000548          |

|    |   |           |           |           |    |   |           |           |           |
|----|---|-----------|-----------|-----------|----|---|-----------|-----------|-----------|
| 7  | H | 0,029918  | 0,027736  | -0,002182 | 46 | C | 0,218049  | 0,219259  | 0,00121   |
| 8  | C | 0,013295  | 0,013438  | 0,000143  | 47 | O | -0,243445 | -0,253168 | -0,009723 |
| 9  | C | -0,085129 | -0,087882 | -0,002753 | 48 | O | -0,102829 | -0,099308 | 0,003521  |
| 10 | H | 0,03496   | 0,031276  | -0,003684 | 49 | C | -0,04287  | -0,046891 | -0,004021 |
| 11 | H | 0,04556   | 0,038037  | -0,007523 | 50 | H | 0,058192  | 0,049519  | -0,008673 |
| 12 | H | 0,030993  | 0,031275  | 0,000282  | 51 | H | 0,060885  | 0,052463  | -0,008422 |
| 13 | C | 0,189209  | 0,18527   | -0,003939 | 52 | C | -0,075066 | -0,079851 | -0,004785 |
| 14 | O | -0,245775 | -0,229982 | 0,015793  | 53 | H | 0,046051  | 0,039428  | -0,006623 |
| 15 | N | -0,072318 | -0,0751   | -0,002782 | 54 | H | 0,038658  | 0,033799  | -0,004859 |
| 16 | H | 0,123474  | 0,116808  | -0,006666 | 55 | H | 0,044612  | 0,038535  | -0,006077 |
| 17 | C | 0,017251  | 0,020755  | 0,003504  | 56 | C | 0,233587  | 0,226678  | -0,006909 |
| 18 | H | 0,019391  | 0,032679  | 0,013288  | 57 | O | -0,261951 | -0,232225 | 0,029726  |
| 19 | C | 0,225514  | 0,225285  | -0,000229 | 58 | O | -0,156025 | -0,1721   | -0,016075 |
| 20 | O | -0,256149 | -0,243988 | 0,012161  | 59 | C | 0,07467   | 0,079656  | 0,004986  |
| 21 | O | -0,142463 | -0,159975 | -0,017512 | 60 | C | -0,067822 | -0,089621 | -0,021799 |
| 22 | H | 0,204476  | 0,195566  | -0,00891  | 61 | H | 0,061416  | 0,053231  | -0,008185 |
| 23 | C | -0,036491 | -0,040819 | -0,004328 | 62 | H | 0,055033  | 0,041807  | -0,013226 |
| 24 | H | 0,041602  | 0,036693  | -0,004909 | 63 | C | 0,034268  | 0,024393  | -0,009875 |
| 25 | H | 0,048576  | 0,036536  | -0,01204  | 64 | H | 0,054576  | 0,043778  | -0,010798 |
| 26 | C | -0,048422 | -0,053643 | -0,005221 | 65 | H | 0,046906  | 0,037171  | -0,009735 |
| 27 | H | 0,03999   | 0,034599  | -0,005391 | 66 | O | -0,094923 | -0,106238 | -0,011315 |
| 28 | H | 0,065408  | 0,052511  | -0,012897 | 67 | C | 0,217724  | 0,207716  | -0,010008 |
| 29 | C | 0,219566  | 0,215906  | -0,00366  | 68 | O | -0,19182  | -0,261603 | -0,069783 |
| 30 | O | -0,244624 | -0,262673 | -0,018049 | 69 | C | 0,170568  | -0,007547 | -0,178115 |
| 31 | O | -0,179266 | -0,167102 | 0,012164  | 70 | C | 0,153482  | -0,07553  | -0,229012 |
| 32 | H | 0,137423  | 0,14078   | 0,003357  | 71 | H | 0,106445  | 0,04029   | -0,066155 |
| 33 | C | -0,045278 | -0,04607  | -0,000792 | 72 | H | 0,082412  | 0,026503  | -0,055909 |
| 34 | H | 0,041669  | 0,034804  | -0,006865 | 73 | C | -0,0433   | -0,085824 | -0,042524 |
| 35 | H | 0,022234  | 0,022158  | -7,6E-05  | 74 | H | 0,091619  | 0,037442  | -0,054177 |
| 36 | C | -0,024249 | -0,02481  | -0,000561 | 75 | H | 0,065565  | 0,034415  | -0,03115  |
| 37 | H | 0,041156  | 0,035047  | -0,006109 | 76 | H | 0,094158  | 0,038336  | -0,055822 |
| 38 | C | 0,207028  | 0,206516  | -0,000512 | 77 | H | 0,1895    | 0,192081  | 0,002581  |
| 39 | O | -0,268892 | -0,286138 | -0,017246 |    |   |           |           |           |

**Table S3.** Gibb free energy of the glass ionomer molecules ( $E_{GIC}$ ), modified polymer ( $E_P$ ), metal atoms ( $E_M$ ) and interaction energy ( $E_i$ ) in Hartree. Calculated at M06/6-311G(d,p)

| Molecule        | $E_{GIC}$    | $E_P$        | $E_M$            | $E_i$    |
|-----------------|--------------|--------------|------------------|----------|
| AACA-1- GM3-Ca  | -2571.969795 |              | Ca: -677.559624  | 0.965729 |
| AACA-1- GM3-Zn  | -3673.480954 | -1895.3759   | Zn: -1779.230858 | 1.125804 |
| AACA-1- GM3-Al  | -2136.185391 |              | Al: -242.367728  | 1.558237 |
| AADH-1- GM3-Ca  | -2724.269088 |              |                  | 0.964736 |
| AADH-1- GM3-Zn  | -3825.743167 | -2047.6742   |                  | 1.161891 |
| AADH-1- GM3-Al  | -2288.428901 |              |                  | 1.613027 |
| AADOH-3- GM3-Ca | -2799.47796  |              |                  | 0.966217 |
| AADOH-3- GM3-Zn | -3900.946782 | -2122.884553 |                  | 1.168629 |
| AADOH-3- GM3-Al | -2363.531028 |              |                  | 1.721253 |
| ABA-1- GM2-Ca   | -2454.169012 |              |                  | 0.962179 |
| ABA-1- GM2-Zn   | -3555.668337 | -1777.571567 |                  | 1.134088 |
| ABA-1- GM2-Al   | -2018.362941 |              |                  | 1.576354 |
| AG-1-GM1-Ca     | -2414.874214 |              |                  | 0.962179 |
| AG-1-GM1-Zn     | -3516.370548 | -1738.287167 |                  | 1.134088 |
| AG-1-GM1-Al     | -1979.05695  |              |                  | 1.576354 |
| AGA-2- GM2-Ca   | -2681.9934   |              |                  | 0.944139 |
| AGA-2- GM2-Zn   | -3783.488178 | -2005.377915 |                  | 1.120595 |
| AGA-2- GM2-Al   | -2246.194971 |              |                  | 1.550672 |
| AH-2- GM2-Ca    | -2679.056654 |              |                  | 0.95241  |
| AH-2- GM2-Zn    | -3780.540674 | -2002.449440 |                  | 1.139624 |
| AH-2- GM2-Al    | -2243.228269 |              |                  | 1.588899 |
| EU-2- GM3-Ca    | -2478.250977 |              |                  | 0.944463 |
| EU-2- GM3-Zn    | -3579.726855 | -1801.635816 |                  | 1.139819 |
| EU-2- GM3-Al    | -2042.783131 |              |                  | 1.220413 |
| MBA-1- GM2-Ca   | -2493.43679  |              |                  | 0.963159 |
| MBA-1- GM2-Zn   | -3594.939606 | -1816.840325 |                  | 1.131577 |
| MBA-1- GM2-Al   | -2057.640636 |              |                  | 1.567417 |
| MG-1- GM1-Ca    | -2454.149232 |              |                  | 0.969037 |
| MG-1- GM1-Zn    | -3555.639675 | -1777.558645 |                  | 1.149828 |
| MG-1- GM1-Al    | -2018.271977 |              |                  | 1.654396 |
| MGA-1- GM2-Ca   | -2721.196926 |              |                  | 0.987918 |
| MGA-1- GM2-Zn   | -3822.715217 | -2044.62522  |                  | 1.140861 |
| MGA-1- GM2-Al   | -2285.426815 |              |                  | 1.566133 |
| MH-1- GM3-Ca    | -2718.313605 |              |                  | 0.963901 |
| MH-1- GM3-Zn    | -3819.807991 | -2041.717882 |                  | 1.140749 |
| MH-1- GM3-Al    | -2282.546208 |              |                  | 1.539402 |
| NMP-1- GM2-Ca   | -2570.747451 |              |                  | 0.979992 |
| NMP-1- GM2-Zn   | -3672.252199 | -1894.167819 |                  | 1.146478 |
| NMP-1- GM2-Al   | -2134.839503 |              |                  | 1.696044 |
| NVC-1- GM2-Ca   | -2382.192909 |              |                  | 1.001583 |
| NVC-1- GM2-Zn   | -3483.71965  | -1705.634868 |                  | 1.146076 |
| NVC-1- GM2-Al   | -1946.710745 |              |                  | 1.291851 |
| NVP-1- GM2-Ca   | -2303.692136 |              |                  | 0.967644 |
| NVP-1- GM2-Zn   | -3405.194127 | -1627.100156 |                  | 1.136887 |
| NVP-1- GM2-Al   | -1868.32228  |              |                  | 1.145604 |

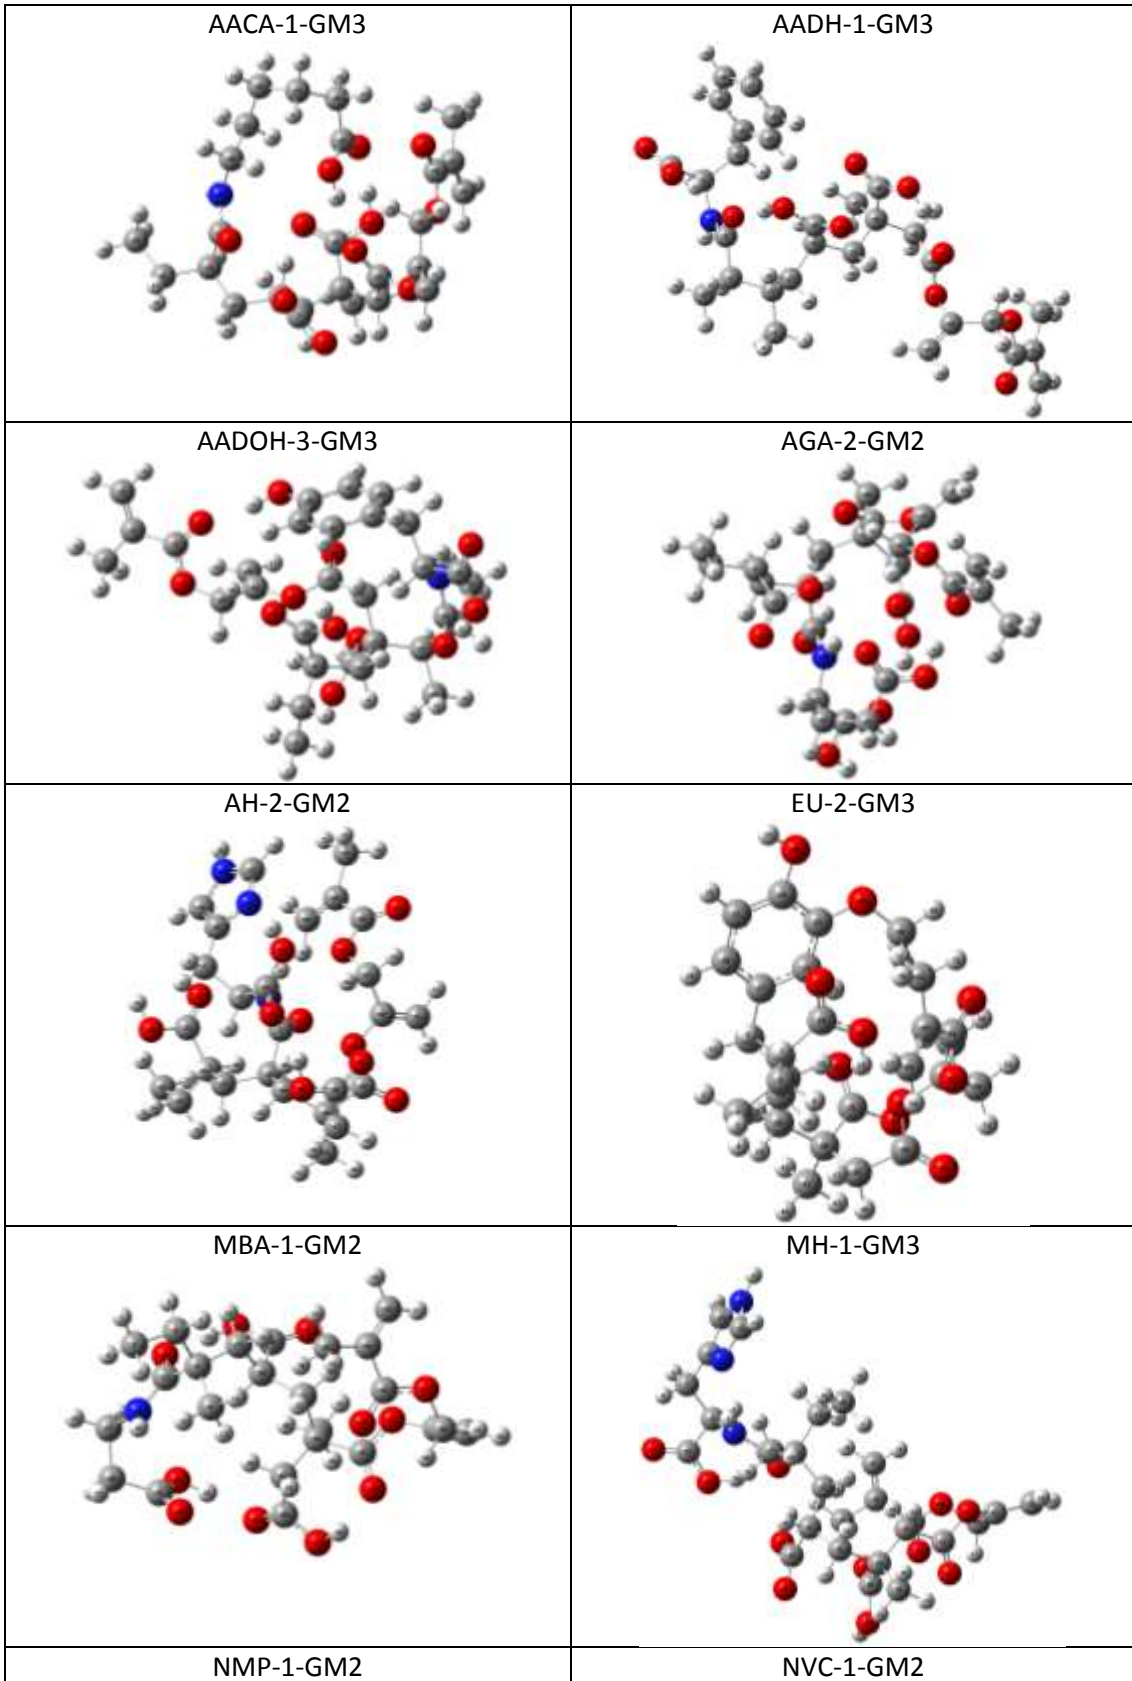

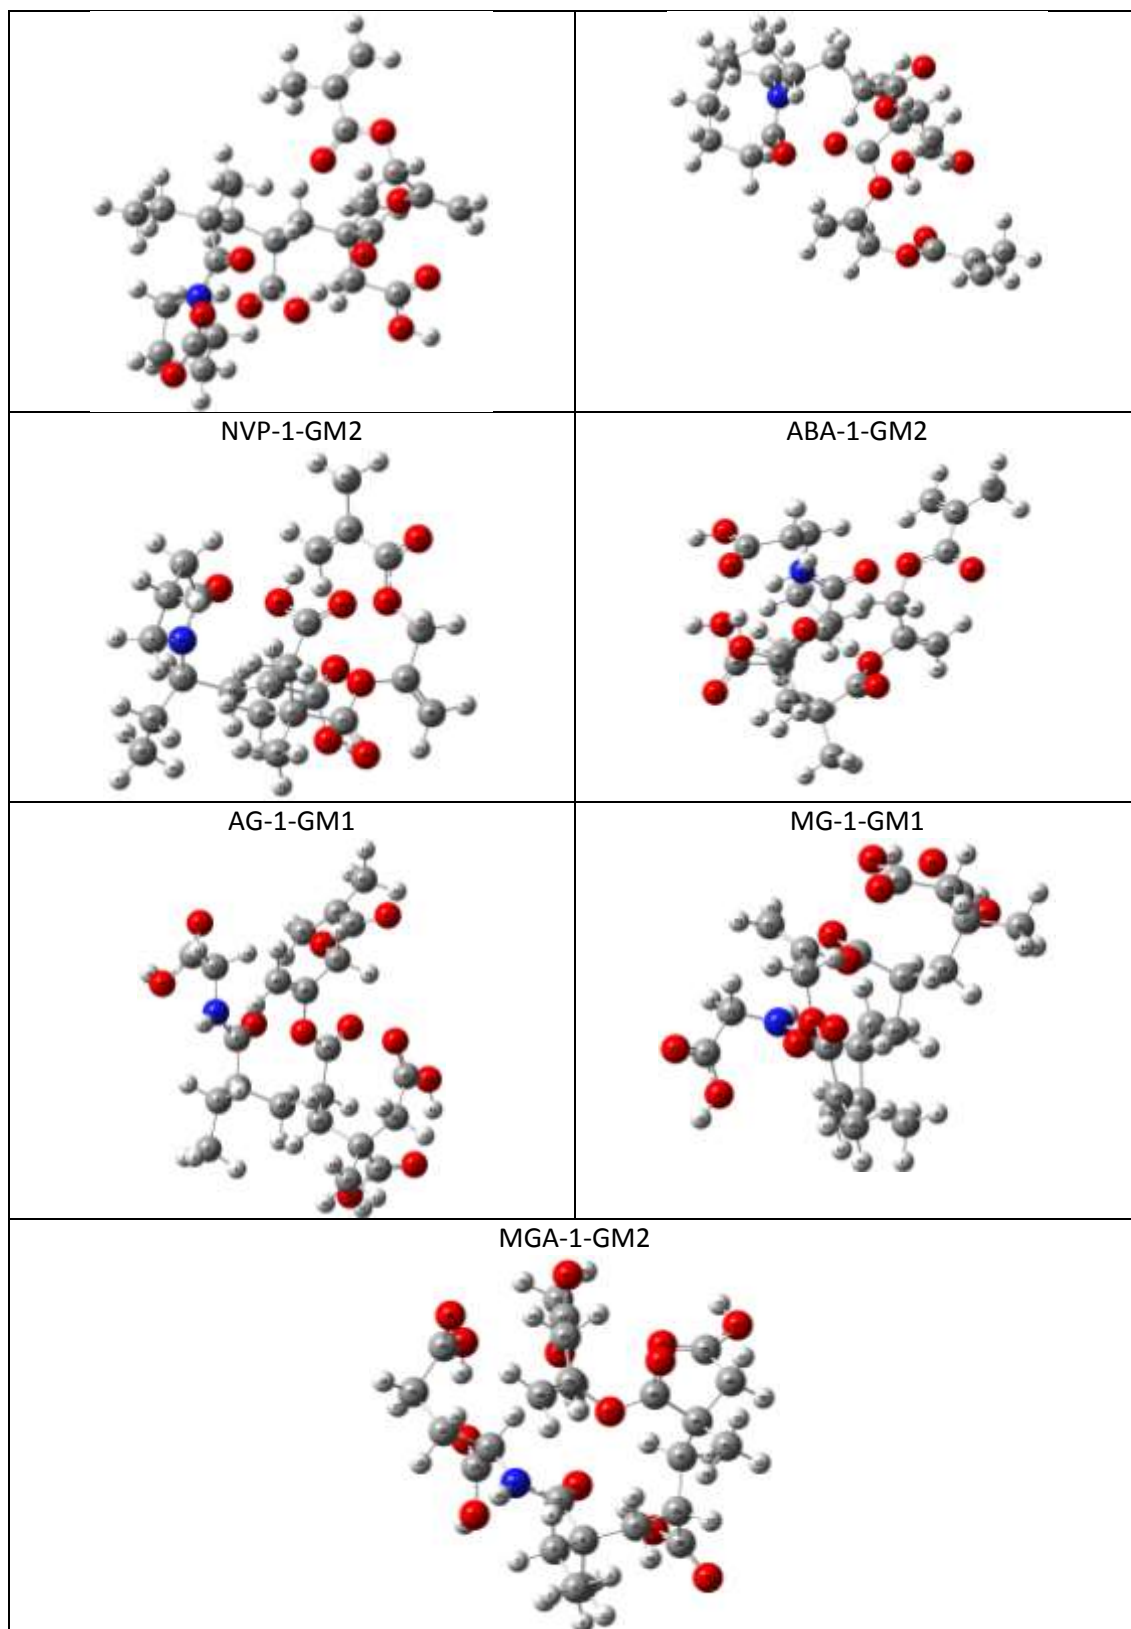

**Figure S1.** More stable molecules obtained from the addition reaction of glycidyl methacrylate on the polyacids studied. Optimized to M06-2X/6-311G(d,p)
